1 **Human embryoid bodies model basal lamina assembly and**  
2 **muscular dystrophy**

3

4 **Alec R. Nickolls<sup>1,2</sup>, Michelle M. Lee<sup>1</sup>, Kristen Zukosky<sup>1,2</sup>, Barbara S. Mallon<sup>1</sup>,**  
5 **Carsten G. Bönnemann<sup>1,\*</sup>**

6

7 <sup>1</sup>National Institute of Neurological Disorders and Stroke, National Institutes of Health,  
8 Bethesda, MD 20892, USA

9 <sup>2</sup>Department of Neuroscience, Brown University, Providence, RI 02912, USA

10

11 \*Correspondence: [carsten.bonnemann@nih.gov](mailto:carsten.bonnemann@nih.gov)

12 **Abstract**

13

14       The basal lamina is a specialized sheet of dense extracellular matrix (ECM),  
15 linked to the plasma membrane of specific cell types in their tissue context, that serves  
16 as a structural scaffold for organ genesis and maintenance. Disruption of the basal  
17 lamina and its functions is central to many disease processes, including cancer  
18 metastasis, kidney disease, eye disease, muscular dystrophies, and specific types of  
19 brain malformation. The latter three pathologies occur in the dystroglycanopathies,  
20 which are caused by dysfunction of the ECM receptor dystroglycan. However,  
21 opportunities to study the basal lamina in various human disease tissues are restricted  
22 due to its limited accessibility. Here, we report the generation of embryoid bodies from  
23 human induced pluripotent stem cells to model basal lamina formation. Embryoid bodies  
24 cultured via this protocol mimic pre-gastrulation embryonic development, consisting of  
25 an epithelial core surrounded by a basal lamina and a peripheral layer of ECM-secreting  
26 endoderm. In dystroglycanopathy patient embryoid bodies, electron and fluorescence  
27 microscopy revealed ultrastructural basal lamina defects and reduced ECM assembly.  
28 By starting from patient-derived cells, these results establish a method for the *in vitro*  
29 synthesis of patient-specific basal lamina and recapitulate disease-relevant ECM  
30 defects seen in muscular dystrophies. Finally, we applied this system to evaluate an  
31 experimental ribitol supplement therapy on genetically diverse dystroglycanopathy  
32 patient samples.

## 33 **Introduction**

34

35           Metazoan life relies on tissue compartmentalization to form ordered, discrete  
36 organs. This is partly accomplished by an extracellular matrix (ECM) barrier called the  
37 basal lamina, which ensheaths epithelial, endothelial, adipose, muscle, and nervous  
38 tissue [36]. The main components comprising the basal lamina are laminin isoforms,  
39 perlecan, nidogen, and collagen type IV, forming a complex lattice anchored to cell  
40 surface receptors [51]. This cell-ensheathing basal lamina is generally inter-connected,  
41 on its acellular matrix side, to a “lamina reticularis” composed of fibrillar collagens,  
42 microfibrils, and proteoglycans. Together, they form a multilayered basement  
43 membrane with tissue-specific mechanical properties [41, 51]. The terms “basal lamina”  
44 and “basement membrane” are sometimes used interchangeably. However, here they  
45 will refer to distinct structures, with the basal lamina being the dense, cell-attached  
46 component of the basement membrane.

47           The basal lamina is an essential structural component for organ genesis and  
48 maintenance. Its perturbation is linked to many human clinical conditions including  
49 metastatic cancer, nephropathy, lissencephaly, and muscular dystrophy. One  
50 mechanistic group of basal lamina-related diseases pertains to the dysfunction of the  
51 cell membrane ECM receptors integrin and dystroglycan [15, 47]. These receptors  
52 mediate cell attachment to the basal lamina, and in turn they influence the arrangement  
53 of the basal lamina itself [20, 30, 31, 35].

54           There is an expanding literature on the spectrum of disorders caused by  
55 dystroglycan receptor dysfunction, collectively termed the dystroglycanopathies, which

56 are estimated to constitute roughly a third of all congenital muscular dystrophies [17]. A  
57 hallmark of severe dystroglycanopathies is rupture or detachment of the basal lamina  
58 that encases the brain and muscle fibers during development and structural  
59 maintenance [10, 25]. This specific combination of basal lamina abnormalities is  
60 associated with a range of developmental nervous system malformations and  
61 progressive skeletal muscle degeneration that may ultimately be fatal [38].

62 The biochemical basis of the dystroglycanopathies is a reduction in a highly  
63 specific form of O-linked glycosylation on dystroglycan's  $\alpha$ -subunit ( $\alpha$ DG). This leads to  
64 a "hypoglycosylation" of the final  $\alpha$ DG glycoepitope, which is referred to as the  
65 matriglycan [49]. Matriglycans on  $\alpha$ DG confer binding activity to the ECM molecules  
66 laminin, perlecan, and nidogen [4]. Hypoglycosylated matriglycans have limited ECM  
67 binding capacity, which is thought to destabilize the basal lamina in muscle and brain  
68 tissue as a common disease pathway in the dystroglycanopathies [34, 35]. The 17  
69 genes that are known to be mutated in the dystroglycanopathies all affect the formation  
70 of matriglycans and include various specific glycosyltransferases as well as enzymes  
71 preparing specific sugars to be incorporated, while only very few cases involve the gene  
72 encoding dystroglycan itself. Based on this knowledge, a large proportion of the  
73 dystroglycanopathy cases can now be clarified genetically [8, 17].

74 Understanding the mechanisms of pathogenesis and developing rational  
75 therapies for the dystroglycanopathies remains a challenge, in part due to its phenotypic  
76 and genetic heterogeneity. A large collection of dystroglycanopathy animal models  
77 recapitulates many aspects of the clinical spectrum [38]. However, such approaches fall

78 short of modeling the genetic diversity of human patients for assessing disease  
79 phenotypes and drug responses.

80 To study patient-specific basal lamina in a model system, we developed a  
81 protocol to generate ECM-containing spheroids from human induced pluripotent stem  
82 cells (hiPSCs), which we refer to as embryoid bodies. hiPSC-derived embryoid bodies  
83 produce their own basal lamina and represent a simplified 3D system to investigate  
84 human ECM and its receptors in diverse genetic contexts. As a proof of concept, we  
85 applied this method to produce embryoid bodies from a variety of dystroglycanopathy  
86 patients. We observed subtle basal lamina defects that correlated with disease severity  
87 and corroborate findings in mouse models. Lastly, we evaluated patient hiPSCs and  
88 embryoid bodies treated with the sugar alcohol ribitol, a recently proposed therapeutic  
89 for the dystroglycanopathies. By correlating patient genotype and drug response, this  
90 approach allows for pre-clinical prediction of therapeutic efficacy in specific individuals.

## 91 **Materials and methods**

92

### 93 **Generation of hiPSC Lines**

94 Written informed consent for patient participation was obtained by a qualified  
95 investigator (protocol 12-N-0095 approved by the National Institute of Neurological  
96 Disorders and Stroke, National Institutes of Health). Dystroglycanopathy patient hiPSCs  
97 were reprogrammed from dermal fibroblasts using an hOKSML mRNA reprogramming  
98 kit (Stemgent, 00-0067). Control-1 hiPSCs were reprogrammed in the same manner  
99 from BJ foreskin fibroblasts (ATCC, CRL-2522). Immunocytochemical validation of germ  
100 layer differentiation was performed off-site (Stemgent). Control-2 hiPSCs were  
101 reprogrammed from control foreskin fibroblasts (ATCC, CRL-2097) using the CytoTune-  
102 iPS 2.0 Sendai reprogramming kit (Thermo Fisher, A16517). Control-3 hiPSCs (NC15)  
103 were previously generated by lentiviral reprogramming of adult dermal fibroblasts [18].  
104 Karyotype analysis was performed after at least 10 passages (WiCell), and all cell lines  
105 were routinely tested for mycoplasma contamination (LT07-118, Lonza).

106

### 107 **hiPSC Culture**

108 Human hiPSCs were maintained with daily changes of E8 medium (Thermo Fisher,  
109 A1517001) on tissue culture-treated polystyrene plates coated with Matrigel (Corning,  
110 354277) and passaged every 4 – 6 days using ReLeSR (STEMCELL Technologies,  
111 05872).

112

### 113 **Embryoid Body Differentiation**

114 Differentiation of human hiPSC-derived embryoid bodies was performed essentially as  
115 described previously for human embryonic stem cells [45]. At least one passage before  
116 differentiation, hiPSCs were transitioned to MEF co-culture. The MEFs (Millipore,  
117 PMEF-CF) were seeded at 30,000 cells/cm<sup>2</sup> on plates coated with gelatin (STEMCELL  
118 Technologies, 07903) and maintained in serum-containing medium consisting of KO-  
119 DMEM (10829-018), 20% FBS (26140-079), 100 μM non-essential amino acids (11140-  
120 050), 2 mM GlutaMAX (35050-061), and 55 μM β-mercaptoethanol (21985-023) (all  
121 from Invitrogen).

122 hiPSCs were dissociated with ReLeSR and plated on MEFs in knockout serum  
123 replacement medium consisting of KO-DMEM, 20% KSR (Invitrogen, 10828-028), 100  
124 μM non-essential amino acids, 2 mM GlutaMAX, 55 μM β-mercaptoethanol, 10 ng/mL  
125 bFGF (Thermo Fisher, 233-FB-025), and 10 μM Y-27632 (Tocris, 1254). The medium  
126 was changed daily (without Y-27632) until hiPSCs reached roughly 60% confluency.

127 For embryoid body formation, hiPSCs were dissociated by Collagenase Type IV  
128 (Invitrogen 17104-019) and manual scraping followed by gravity sedimentation to  
129 remove as many MEFs as possible. The cells were then individualized with Accutase  
130 (Invitrogen, A11110501), and 2.4 x 10<sup>6</sup> cells were seeded per well of an AggreWell 400  
131 (STEMCELL Technologies, 34411) following manufacturer's instructions by  
132 centrifugation in X-VIVO 10 medium (Lonza, 04-380Q) with 10 μM Y-27632. The  
133 following day, spheroids were extracted from the AggreWell 400 according to  
134 manufacturer's instructions and cultured in ultra-low attachment dishes (Corning, 3262)  
135 with serum-containing medium for up to four days with a medium change every other  
136 day.

137

### 138 **Endoderm-Free Embryoid Body Culture**

139 Before endoderm-free embryoid body experiments, feeder-free hiPSCs were  
140 maintained on Matrigel in E8 medium. hiPSCs were dissociated with Accutase, and  $1.2$   
141  $\times 10^6$  cells were seeded per well of an AggreWell 400 by centrifugation in E8 with  $10 \mu\text{M}$   
142 Y-27632. The next day, spheroids were transferred to ultra-low attachment 6-well plates  
143 (Corning, 3471) in E8 supplemented with laminin (Invitrogen, 23017015) for 48 hours.  
144  $140 \mu\text{g/mL}$  laminin was used except where otherwise stated in the main text.

145

### 146 **Western Blotting**

147 hiPSCs in 100 mm dishes were lysed by  $200 \mu\text{L}$  RIPA buffer with protease and  
148 phosphatase inhibitors.  $1 \text{ mg}$  soluble protein was incubated overnight at  $4 \text{ }^\circ\text{C}$  in  $500 \mu\text{L}$   
149 RIPA with  $50 \mu\text{L}$  agarose-bound wheat germ agglutinin (Vector Labs, AL-1023) to enrich  
150 the glycoprotein fraction. The agarose was washed three times with RIPA, and the  
151 glycoproteins were eluted by 5-minute incubation at  $95 \text{ }^\circ\text{C}$  in SDS-PAGE loading buffer.  
152 Glycoproteins were ran on 4 – 12% Bis-Tris gels and transferred to PVDF membranes.

153 All blocking steps and antibody incubations were performed in TBST with 5%  
154 milk (glyco- $\alpha\text{DG}$  and  $\beta\text{DG}$ ) or 5% donkey serum (core- $\alpha\text{DG}$ ). The membranes were  
155 probed with antibodies against glyco- $\alpha\text{DG}$ , core- $\alpha\text{DG}$ , or  $\beta\text{DG}$  overnight at  $4 \text{ }^\circ\text{C}$ .  
156 Labeling was visualized by chemiluminescence with appropriate secondary HRP-  
157 conjugated antibodies on a ChemiDoc XRS+ (Bio-Rad). See Table 2 for a list of  
158 antibodies used in this study.

159



160 **Laminin Overlay Assay**

161 PVDF membranes were first blocked with 5% milk in laminin binding buffer (LBB; 140  
162 mM NaCl, 10 mM triethanolamine, 1mM CaCl<sub>2</sub>, 1mM MgCl<sub>2</sub>, 0.05% Tween, pH 7.6) and  
163 then incubated with 1 µg/mL laminin in LBB overnight at 4 °C. PVDF membranes were  
164 washed and probed with laminin antibodies for 1 hour at room temperature in LBB with  
165 5% milk. The membranes were then washed and probed with an appropriate HRP-  
166 conjugated secondary antibody for 1 hour at room temperature in LBB with 5% milk  
167 before chemiluminescent imaging.

168

169 **Immunofluorescence Microscopy**

170 For immunocytochemistry, cells in chamber slides were fixed for 10 minutes in 4% PFA  
171 and then washed with PBS before staining. For immunohistochemistry, embryoid bodies  
172 were fixed for 20 minutes in 4% PFA, cryoprotected by overnight incubation with 30%  
173 sucrose in PBS, and frozen in optimum cutting temperature (OCT) compound (VWR,  
174 25608-930). OCT blocks were sectioned at 10 µm thickness on a cryostat and mounted  
175 on slides for staining.

176 Slides were blocked in 10% goat serum and 0.1% Triton X-100 for 1 hour at  
177 room temperature before primary antibody incubation with 3% goat serum overnight at 4  
178 °C. Secondary antibody labeling was performed at room temperature for 1 hour. Refer  
179 to Table 2 for antibody dilutions and catalog numbers. Fluorescent images were  
180 captured on a Leica TSC SP5 II confocal microscope or a Nikon Eclipse Ti-E inverted  
181 microscope.

182

## 183 **Transmission Electron Microscopy**

184 Embryoid bodies were fixed for 30 minutes at room temperature in 0.1 M cacodylate  
185 buffer with 4% glutaraldehyde, pH 7.4. Samples were then coated in agarose, washed  
186 with buffer, and incubated for 60 minutes at 4 °C in 0.1 M cacodylate buffer with 1%  
187 osmium tetroxide, pH 7.4. The samples were washed and stained *en bloc* overnight at 4  
188 °C in 0.1M acetate buffer with 1% uranyl acetate, pH 5.0. The next day, samples were  
189 dehydrated in ethanol and epoxy resin embedded. 70 nm sections were cut and  
190 counterstained with lead citrate and uranyl acetate. Micrographs were captured on a  
191 JEOL1200EX transmission electron microscope with a digital CCD camera (AMT XR-  
192 100, Danvers, MA, USA).

193

## 194 **Image Quantification and Statistics**

195 The image processing program Fiji was used to analyze all western blots and  
196 microscopy images. Staining intensity was measured by drawing equal sized regions of  
197 interest and measuring the average pixel intensity in each sample. Before statistical  
198 measurements, all data were assessed for normality using the Shapiro-Wilk test. If data  
199 were not normally distributed, they were analyzed by Kruskal-Wallis test with Dunn's  
200 correction for multiple comparisons (Fig. 5e). If data were normally distributed, an  
201 ordinary one-way ANOVA was used and corrected with Tukey's multiple comparisons  
202 test (all other figures). The number of replicates, n, for each analysis are reported in  
203 their respective figure legend. Prism 7.0 (GraphPad software) was used to make all  
204 statistical tests and graphs.

## 205 **Results**

206

### 207 **Human Embryoid Bodies Mimic Pre-Gastrulation Development**

208 To establish an hiPSC-based model of basal lamina assembly, we used a  
209 microwell plate to generate spheroids of human hiPSCs (Fig. 1a, b). Following transfer  
210 of the spheroids into suspension culture, we tested multiple conditions for optimal ECM  
211 production. Spheroids grown in a standard knockout serum replacement (KSR) medium  
212 formed a cavitated core and differentiated into a Nestin+ neuroectodermal lineage (Fig.  
213 2a). This result could be achieved with either feeder-free hiPSCs or with feeder-  
214 dependent hiPSCs, the latter of which were cultured on a feeder layer of mouse  
215 embryonic fibroblasts (MEFs) prior to spheroid formation.

216 We next tested the effect of serum on hiPSC spheroid differentiation. In a  
217 medium with 20% serum, spheroids from feeder-free hiPSCs consisted of an outer  
218 SOX17+ endodermal layer and a disorganized core of differentiated OCT4- cells (Fig.  
219 2b). These spheroids, as well as those discussed above that were maintained in KSR  
220 medium, were mostly devoid of ECM as assessed by antibodies against the basal  
221 lamina protein laminin (data not shown).

222 In contrast, we found that feeder-dependent hiPSCs produced spheroids with two  
223 visibly partitioned domains when cultured in serum-containing medium (Fig. 1c, 2b).  
224 These particular spheroids were characterized by a SOX17+ endodermal periphery and  
225 an OCT4+ epithelial core. The SOX17+ cells were often mixed with an additional  
226 unidentified OCT4-/SOX17- population. These inner and outer tissue compartments  
227 were demarcated by a laminin-rich basal lamina (Fig. 1c).

228           The SOX17+ endodermal cells were apparently responsible for ECM secretion,  
229 with disorganized aggregates of laminin visible in the spheroid outer layer (Fig. 1c). The  
230 underlying core of OCT4+ cells appeared as a radially arranged epithelium and  
231 expressed the basal lamina receptor  $\alpha$ DG, which was enriched at the basal lamina  
232 interface between the two tissue domains (Fig. 1c). Surprisingly, as little as one  
233 passage on MEFs was sufficient to prime the hiPSCs for this self-organized  
234 differentiation. Similar tissue patterning has been reported in spheroids derived from  
235 mouse and human embryonic stem cells [30, 45]. The observed structure is thought to  
236 represent pre-gastrulation embryonic development, with an epiblast-like core and an  
237 outer layer of extra-embryonic endoderm. Because the hiPSC-derived spheroids  
238 produced with our protocol resemble this developmental stage, we refer to them  
239 hereafter as embryoid bodies.

240

### 241 **Derivation of hiPSCs from Dystroglycanopathy Patients**

242           Because hiPSC-derived embryoid bodies express  $\alpha$ DG and produce ECM in the  
243 form of a basal lamina, we sought to apply this system for evaluating basal lamina  
244 phenotypes in dystroglycanopathy – a diverse spectrum of muscular dystrophies often  
245 co-morbid with brain malformation, characterized by ruptures in the basal lamina. We  
246 reprogrammed hiPSCs from dermal fibroblasts of three unrelated individuals with a  
247 genetic diagnosis of dystroglycanopathy. Each patient harbored predicted pathogenic  
248 mutations in a different gene required for the glycosylation of  $\alpha$ DG: *LARGE*, *FKRP*, or  
249 *POMT2* (Table 1). The *LARGE* patient has been reported in a previous publication [33].

250 Clinical presentation for all three patients included delayed motor milestones,  
251 muscle weakness, and cognitive impairments (Table 1). Overall, the FKR patient had  
252 the mildest clinical and muscle biopsy findings, while the patient with the POMT2  
253 mutations had the most severe findings. Brain magnetic resonance imaging showed  
254 minor white matter and structural abnormalities in the LARGE patient [33] and POMT2  
255 patient (data not shown). Hypoglycosylation of  $\alpha$ DG is the primary causative factor in  
256 the pathogenesis of dystroglycanopathy [34]. To evaluate the glycosylation status of  
257  $\alpha$ DG in patient cells, we used the I1H6C4 antibody that specifically recognizes the  
258 glycosylated form of  $\alpha$ DG (glyco- $\alpha$ DG). Consistent with clinical and genetic  
259 observations, we found reduced expression of glycosylated  $\alpha$ DG in our patient hiPSCs  
260 (Fig. 3a). Two hiPSC clones were evaluated for each patient. All cell lines had a normal  
261 karyotype, and there were no discernible differences in the expression of pluripotent  
262 markers or propensity for germ layer differentiation (Fig. 3a, 4a-c).

263 To confirm the finding that patient cells express a hypoglycosylated form of  $\alpha$ DG,  
264 we carried out western blots on hiPSC culture lysates using the I1H6C4 antibody.  
265 Probing for glycosylated  $\alpha$ DG showed a reduction that roughly correlated with the  
266 clinical severity for each patient (Fig. 3b, c). Control hiPSCs expressed  $\alpha$ DG glycoforms  
267 averaging ~140 kDa, which is slightly less than reported in human muscle [26]. Previous  
268 analysis suggests that low molecular weight forms of  $\alpha$ DG – a consequence of fewer  
269 glycan structures – is a specific biochemical hallmark associated with disease severity  
270 [14]. Our study followed this pattern, with cells from the clinically mild FKR patient  
271 expressing glycosylated  $\alpha$ DG of the same mass as controls but in reduced abundance.  
272 Glycosylated  $\alpha$ DG from the LARGE patient, who was of intermediate severity, showed a

273 ~30 kDa downward shift in molecular weight. hiPSCs from the severe POMT2 patient  
274 were virtually devoid of glycosylated  $\alpha$ DG.

275 To test the functional impact of these hypoglycosylated forms of  $\alpha$ DG, we  
276 performed a laminin overlay assay to measure the affinity of  $\alpha$ DG for one of its ECM  
277 ligands, laminin. All patient cell lines showed reduced  $\alpha$ DG-laminin binding activity that  
278 closely matched their degree of  $\alpha$ DG hypoglycosylation (Fig. 3b, d). Blotting with  
279 antibodies against the core peptide of  $\alpha$ DG (core- $\alpha$ DG) and  $\beta$ -dystroglycan ( $\beta$ DG)  
280 indicated similar expression across all samples, demonstrating that the dystroglycan  
281 proteins are expressed but that  $\alpha$ DG is hypoglycosylated in dystroglycanopathy patient  
282 hiPSCs (Fig. 3b).

283

#### 284 **Differentiation of Embryoid Bodies from Dystroglycanopathy hiPSCs**

285 Muscle, eye, and brain abnormalities linked to basal lamina defects is a frequent  
286 finding in the dystroglycanopathies. Given that dystroglycanopathy patient hiPSCs  
287 exhibit the biochemical hallmark of the disease (i.e. hypoglycosylation of the basal  
288 lamina receptor  $\alpha$ DG), we next asked whether patient embryoid bodies can synthesize  
289 basal lamina. To investigate potential disease-related phenotypes, we initially restricted  
290 our analysis to embryoid bodies from the LARGE patient and POMT2 patient, who had  
291 moderate and severe clinical findings respectively.

292 We differentiated control and patient hiPSCs into embryoid bodies using the  
293 protocol described earlier. Embryoid bodies from all cell lines contained a basal lamina  
294 sandwiched by epithelial and endodermal compartments (Fig. 5a). There was  
295 noticeable morphological variation across cell lines, possibly related to genetic  
296 background or clonal differences. Particularly in embryoid bodies from the third control

297 and the LARGE patient, there was an occasional inversion of tissue layers such that the  
298 epithelial cells were on the exterior of the embryoid body (Fig. 5a).

299 Despite the heterogeneity between cultures, embryoid bodies from all control and  
300 patient hiPSC clones were similarly capable of assembling a laminin-rich basal lamina  
301 at the surface of the OCT4+ epithelium. Additionally, all embryoid bodies showed the  
302 expected morphology of epithelial polarity. OCT4+ cells were radially arranged and  
303 exhibited apicobasal polarity, with F-actin distributed on the cellular edge opposite from  
304 the basal lamina (Fig. 5b). Thus, at this resolution of analysis, we detected no major  
305 phenotypic difference between control and dystroglycanopathy embryoid bodies.

306 Consistent with our finding in undifferentiated hiPSCs, LARGE and POMT2  
307 embryoid bodies were minimally reactive to an antibody recognizing glycosylated  $\alpha$ DG.  
308 However, all embryoid bodies expressed the other major basal lamina receptor,  
309 integrin- $\beta$ 1 (Fig. 5c). Study of mouse embryoid bodies has shown functional redundancy  
310 between integrin- $\beta$ 1 and  $\alpha$ DG in anchoring ECM molecules to the cell membrane [31].  
311 This likely explains the ability of dystroglycanopathy patient embryoid bodies to  
312 assemble a basal lamina in the absence of  $\alpha$ DG receptor function.

313

### 314 **Ultrastructural Basal Lamina Defects in Dystroglycanopathy Embryoid Bodies**

315 Previous studies of dystroglycanopathy patient and mouse tissue have revealed  
316 ultrastructural ECM defects [14, 25]. To visualize embryoid body ECM ultrastructure, we  
317 employed transmission electron microscopy on thin sections of control and patient  
318 samples. In electron micrographs, basal lamina from control embryoid bodies was  
319 visible as a fibrous layer at the epithelial cell surface, roughly 100 nm thick (Fig. 5d).

320 The overlying endodermal cell, some distance away, was always devoid of basal  
321 lamina. The basal lamina was composed of a 'lamina lucida' and a 'lamina densa'  
322 compartment. The lamina lucida – a thin electron-light layer at the epithelial plasma  
323 membrane – is believed to be spanned by the laminin long arm bound to its cell surface  
324 receptors,  $\alpha$ DG and integrin [42]. The lamina densa – a thicker fibrous layer of electron-  
325 dense material just above the lamina lucida – is comprised of laminin cross-linking  
326 arms, perlecan, nidogen, and COLIV. However, the existence or extent of the lamina  
327 lucida may also be an artifact of our sample dehydration method [6].

328 The epithelial cells of embryoid bodies showed typical features of lateral, apical,  
329 and basal polarization. We observed electron-dense tight junctions at cell-cell borders,  
330 and microvilli decorated the epithelial cells' apical aspect facing the embryoid body  
331 lumen (Fig. 6). Nuclei were polarized toward the basal aspect of epithelial cells in  
332 contact with the basal lamina (Fig. 5d). Occasionally, filamentous matrix could be seen  
333 in the extracellular space between endodermal and epithelial cells, but it was rarely  
334 attached to the basal lamina itself (Fig. 6). Therefore, the ECM structures in our  
335 embryoid bodies meet the criteria for an epithelial basal lamina. However, they cannot  
336 be categorized as a complete basement membrane, which requires an adjoined layer of  
337 'lamina reticularis' fibrillar collagens [41].

338 In LARGE and POMT2 embryoid bodies, the basal lamina was noticeably thinner  
339 due to a reduction of material in the lamina densa (Fig. 5d). Specifically, in POMT2  
340 embryoid bodies, the basal lamina occasionally contained nanoscopic discontinuities  
341 (Fig. 5d). The basal lamina in control embryoid bodies measured  $105.8 \pm 6.1$  nm thick.



342 LARGE and POMT2 basal lamina were significantly thinner at  $77.5 \pm 5.1$  and  $69.1 \pm 4.5$   
343 nm respectively (mean  $\pm$  s.e.m.,  $P = 0.0022$  and  $P < 0.0001$ ) (Fig. 5e).

344 We considered whether a deficit of certain ECM molecules might explain the  
345 reduced thickness of patient basal lamina. In addition to laminin,  $\alpha$ DG directly binds to  
346 perlecan, which in turn crosslinks nidogen and collagen type IV (COLIV) to form the  
347 basal lamina [39, 44]. Overall, there were no consistently detectable differences in the  
348 staining pattern or intensity of these basal lamina components between control and  
349 patient embryoid bodies (Fig. 7a). However, in some POMT2 embryoid bodies, there  
350 was occasionally a subtle loss of perlecan and COLIV co-localization with laminin (Fig.  
351 7b).

352 Over the course of differentiation, embryoid bodies were remarkably static in  
353 size, and there was no significant difference between control and POMT2 embryoid  
354 body surface area (Fig. 7c, d). This contrasts greatly with brain and muscle tissue,  
355 which undergo significant size expansion and mechanical strain during embryonic  
356 development and muscle contraction, respectively [20, 24]. Thus, our embryoid body  
357 differentiation protocol serves as a simplified model for patient-specific basal lamina  
358 assembly, without the additional variables of tissue movement and growth. In this  
359 system, dystroglycanopathy embryoid bodies with mutations in *LARGE* or *POMT2* can  
360 synthesize a basal lamina of apparently typical molecular composition but with  
361 abnormal ultrastructure. These data corroborate published results demonstrating that  
362  $\alpha$ DG is generally dispensable for initial basal lamina formation [9, 30, 35].

363 Because our embryoid body differentiation protocol requires co-culture of hiPSCs  
364 with MEFs, we reasoned that abundant fibroblast ECM secretion could be masking

365 disease-related deficits in basal lamina assembly. To evaluate this possibility, we  
366 labeled control and POMT2 hiPSCs and embryoid bodies with antibodies against  
367 human nuclear antigen (HuNu). In feeder-dependent hiPSC cultures, human hiPSCs  
368 were clearly distinguished by HuNu expression, while MEFs were heavily labeled by  
369 laminin antibodies (Fig. 8a). In embryoid bodies, hiPSCs and MEFs self-segregated  
370 within 24 hours of spheroid formation, with MEFs budding off and ultimately detaching  
371 from the differentiating embryoid body 2 – 4 days before basal lamina formation (Fig.  
372 8b). Because all analyses were conducted on day 5 embryoid bodies, we believe the  
373 presence of MEFs is not a significant confounding factor in our experiments.

374

### 375 **Impaired Basal Lamina Assembly on Endoderm-Free Dystroglycanopathy** 376 **Embryoid Bodies**

377 Knockout of dystroglycan in mouse embryonic stem cells and neural stem cells  
378 has been reported to reduce laminin polymerization at the cell surface, which is a  
379 prerequisite for basal lamina formation [21, 52]. Because we observed thinner basal  
380 lamina in dystroglycanopathy patient embryoid bodies, we next investigated whether  
381 this phenotype might be linked to a reduced ability to polymerize laminin. We developed  
382 an embryoid body culture protocol that both prevents the formation of laminin-secreting  
383 endoderm and obviates the need for MEF co-culture (Fig. 9a, b). This eliminated the  
384 major sources of ECM and allowed for precise control of laminin concentration by  
385 exogenous supplementation in the growth medium.

386 In the absence of laminin, endoderm-free embryoid bodies self-assembled into  
387 disorganized, cavitated spheroids (Fig. 9c). We supplemented various concentrations of

388 laminin to control embryoid bodies and inspected the cultures after 48 hours. Amounts  
389 greater than 100  $\mu\text{g}/\text{mL}$  resulted in a thin layer of laminin at the surface of some  
390 embryoid bodies. In embryoid bodies with significant laminin recruitment, the central  
391 cavity was widened, and cells with direct laminin contact adopted a polarized orientation  
392 (Fig. 9c). POMT2 embryoid bodies – from the most severe dystroglycanopathy patient –  
393 showed a striking absence of accumulated surface laminin except in the highest  
394 concentration tested, 180  $\mu\text{g}/\text{mL}$ . To avoid ceiling and floor effects, we used 140  $\mu\text{g}/\text{mL}$   
395 laminin in subsequent experiments, because approximately half of the control embryoid  
396 body surface area bound laminin at this concentration (Fig. 9c).

397 We tested endoderm-free embryoid bodies from control subjects and LARGE,  
398 FKRP, and POMT2 dystroglycanopathy patients for their capacity to assemble laminin  
399 (Fig. 10a). Compared to controls, which accumulated laminin on  $65.7 \pm 6.3\%$  of  
400 surfaces, POMT2 embryoid bodies showed  $20.5 \pm 5.2\%$  surface laminin (mean  $\pm$  s.e.m.,  
401  $P = 0.0006$ ) (Fig. 10d). In contrast, LARGE and FKRP embryoid bodies assembled  $48.4$   
402  $\pm 7.3\%$  and  $46.1 \pm 10\%$  laminin respectively, which was also reduced but not  
403 statistically different from controls ( $P = 0.405$  and  $P = 0.283$ ) (Fig. 10d).

404

#### 405 **Ribitol Treatment Promotes Functional Glycosylation of $\alpha\text{DG}$ in FKRP Patient** 406 **Embryoid Bodies**

407 FKRP is a glycosyltransferase enzyme that catalyzes the addition of ribitol  
408 phosphate to  $\alpha\text{DG}$  [13, 27, 40]. This is an essential enzymatic step for the post-  
409 translational installation of matriglycans on  $\alpha\text{DG}$ , which are the structural basis for  $\alpha\text{DG}$ -

410 ligand binding [4]. Recently, dietary supplementation with ribitol was shown to improve  
411 muscle phenotypes in a mouse model of FKRP-related dystroglycanopathy [5].

412 To determine the effect of ribitol on dystroglycanopathy patient hiPSCs, we  
413 supplemented the culture medium with 3 mM ribitol daily and harvested the cells 72  
414 hours later. This dosage was based on previous reports of efficacious treatment with  
415 3mM ribitol or CDP-ribitol in ISPD mutant dystroglycanopathy cell cultures [13, 27].  
416 Ribitol treatment of FKRP hiPSCs greatly increased the abundance of glycosylated  $\alpha$ DG  
417 and resulted in a ~20 kDa upward shift in molecular weight (Fig. 10b, 11a). This change  
418 was accompanied by a comparable increase in  $\alpha$ DG-laminin binding. Ribitol-treated  
419 LARGE hiPSCs were unchanged in glycosylated  $\alpha$ DG quantity but showed a slight  
420 increase in molecular weight (5-10 kDa). As would be expected, POMT2 hiPSCs, in  
421 which glycosylated  $\alpha$ DG is essentially absent, showed no improvement with ribitol  
422 exposure (Fig. 10b). In addition to ribitol phosphate, FKRP is known to transfer glycerol  
423 phosphate onto  $\alpha$ DG, which inhibits its functional glycosylation. However, we found that  
424 treating control and FKRP hiPSCs with 3 mM glycerol daily for 72 hours had no  
425 discernable effect on  $\alpha$ DG glycosylation (Fig. 11b).

426 Because ribitol treatment resulted in a specific and profound improvement to  
427 glycosylated  $\alpha$ DG in FKRP hiPSCs, its effect was next assessed in FKRP endoderm-  
428 free embryoid bodies. hiPSCs were treated with 3 mM ribitol daily starting 72 hours  
429 before embryoid body formation and continued throughout the experiment. Treatment of  
430 FKRP embryoid bodies lead to a noticeable increase in the staining intensity of  
431 glycosylated  $\alpha$ DG (Fig. 10a, c). There was a slight but non-significant increase in  
432 surface laminin polymerization on ribitol treated FKRP embryoid bodies ( $62.1 \pm 6.6\%$ )

433 compared to untreated FKRP embryoid bodies ( $46.1 \pm 10\%$ ; mean  $\pm$  s.e.m,  $P = 0.566$ )  
434 (Fig. 10d). Importantly though, at laminin contact points, glycosylated  $\alpha$ DG was  
435 upregulated to the same level as controls (ribitol-treated FKRP:  $107.2 \pm 3.4\%$ ; untreated  
436 FKRP:  $44.5 \pm 3.5\%$ ; normalized to control glyco- $\alpha$ DG, mean  $\pm$  s.e.m.,  $P < 0.0001$ ) (Fig.  
437 10e). These results demonstrate ribitol treatment as a viable therapeutic strategy for  
438 upregulating  $\alpha$ DG glycosylation in FKRP patient tissue.

## 439 Discussion

440

441 Our results provide an approach for evaluating patient-specific basal lamina *in*  
442 *vitro*. We applied this method to study patients with dystroglycanopathy. We found that  
443 patient hiPSC-derived embryoid bodies recapitulate the clinical disease spectrum and  
444 exhibit ECM defects seen in animal models. Finally, this system allowed us to evaluate  
445 the efficacy of ribitol supplementation – a recent candidate therapeutic for the  
446 dystroglycanopathies – in patient samples of different genotypes.

447 Embryoid body-based methods, which essentially involve culturing pluripotent  
448 stem cells in 3D aggregates, are widely used in stem cell research. Typical applications  
449 include evaluating the pluripotency of new cell lines or as an intermediate stage during  
450 differentiation toward specific lineages [28]. Under strict growth conditions, embryoid  
451 bodies from mouse and human embryonic stem cells (ESCs) can exquisitely self-  
452 organize into structures mimicking the pre-gastrulation embryo. These have served as  
453 models for early embryonic events – epiblast polarization and ECM formation – that are  
454 required for tissue genesis [29].

455 Our human hiPSC-derived embryoid bodies resemble their ESC-derived  
456 counterparts by similarly requiring serum-containing media and MEF co-culture to form  
457 polarized epiblast, basal lamina, and extra-embryonic endoderm. It remains unclear why  
458 these conditions uniquely enable such self-organization. BMPs, which are abundant in  
459 serum [22], are known to induce extra-embryonic endoderm differentiation [16]. Co-  
460 culture with MEFs can also influence the lineage bias of ESCs [32]. Thus, it may be a  
461 combination of soluble factors from serum and MEFs that promotes the simultaneous

462 existence of endoderm and epiblast cell populations in our hiPSC-derived embryoid  
463 bodies.

464 Dual genetic deletion of  $\alpha$ DG and integrin- $\beta$ 1 prevents basement membrane  
465 formation and epithelial polarization in mouse ESC-derived embryoid bodies. Because  
466 these two receptors have overlapping roles, expression of one can partly rescue the  
467 function of the other [31]. By studying dystroglycanopathy patient embryoid bodies, we  
468 extend these findings to show that a moderate reduction in  $\alpha$ DG receptor activity – with  
469 normal expression of both  $\alpha$ DG and integrin- $\beta$ 1 core proteins – is sufficient to cause  
470 subtle ECM deficits that may underlie disease pathogenesis.

471 A thin and discontinuous basal lamina has been reported in the muscle of  
472 dystroglycanopathy patients [25, 48], similar to our observation in patient embryoid  
473 bodies. Also, the retina inner limiting basement membrane is thin, patchy, and less stiff  
474 in *Pomgnt1*-null mice [23, 52]. One caveat of our hiPSC-derived embryoid body system  
475 is that it seems to only recapitulate basal lamina development. It is unclear how the  
476 observed basal lamina defects might translate to the formation of a full basement  
477 membrane. Furthermore, the specific structural and molecular deficits underlying such  
478 abnormally thin basal lamina are still unknown.

479 In contrast to the above findings, basement membranes in dystroglycan-null  
480 mouse embryoid bodies, and in the muscle of *Large* mutant mice and certain human  
481 patients, are thicker than controls, sometimes with mislocalized ECM components [14,  
482 30]. These dichotomous observations may be related to differences in ECM recruitment,  
483 organization, and maintenance at the cell surface, as a consequence of reduced  $\alpha$ DG  
484 receptor activity but under specific tissue and disease state circumstances. One study

485 reported a mixture of thinned and duplicated basal lamina in different regions of  
486 dystroglycanopathy patient muscle [46]. Therefore, whether the diseased basal lamina  
487 is thin and patchy, or thick and duplicated, may vary due to local tissue conditions.

488 The pathogenic mechanism of brain malformation in the dystroglycanopathies is  
489 still not fully understood. During brain development, the human cerebral cortex  
490 undergoes massive expansion and folding in the third trimester [12]. This rapid increase  
491 of surface area likely places mechanical strain on the brain's basement membrane  
492 casing, necessitating timely ECM remodeling to accommodate the larger area. In mice,  
493 genetic deletion of ECM genes or hypoglycosylation of  $\alpha$ DG both result in basement  
494 membrane rupture and ensuing tissue malformation during this most rapid phase of  
495 brain development [2, 19, 37, 43]. These data present  $\alpha$ DG as one of several laminin  
496 receptors that contributes to the efficient organization of ECM molecules into a coherent  
497 basement membrane.

498 Our result – that endoderm-free patient embryoid bodies show diminished  
499 laminin accumulation – corroborates evidence that  $\alpha$ DG-deficient cells have reduced  
500 ECM-binding kinetics that might render basement membranes susceptible to  
501 mechanically-induced deformation [21, 52]. Crucially, we found that embryoid bodies  
502 undergo minimal volumetric growth. This could explain the relatively mild phenotypes in  
503 embryoid bodies of even the most severe dystroglycanopathy patient.

504 The human brain specifically undergoes greatest expansion in the occipital,  
505 temporal, and lateral parietal cortices [12]. Such regional growth dynamics suggest one  
506 possible basis for the spatial arrangement of the typical cortical malformation in the  
507 dystroglycanopathies, which are fundamentally due to breaches in basement membrane



508 integrity, resulting in cellular over-migration beyond the confines of the [1, 7, 33, 50].  
509 These particular growth dynamics may also underlie some of the differences between  
510 human patients and mouse models [3].

511 There is currently no effective treatment for the dystroglycanopathies, and the  
512 diversity of underlying genetic causes for the disease presents a challenge for targeted  
513 therapies. Supplementation of the sugar alcohol ribitol has recently emerged as a  
514 promising therapeutic for specific classes of dystroglycanopathy. In mammalian cells,  
515 the enzyme ISPD synthesizes CDP-ribitol from ribitol, which is then attached to  $\alpha$ DG by  
516 the glycosyltransferases FKTN and FKRK [13, 27, 40]. This enzymatic process is a  
517 critical step in constructing the laminin-binding glycan of  $\alpha$ DG.

518 Treatment of ISPD mutant cells with ribitol or CDP-ribitol promotes  $\alpha$ DG  
519 glycosylation [13, 27], and dietary ribitol supplementation rescues muscle phenotypes in  
520 Fkrp mutant mice [5]. Here, we extend this concept from animal models to a human  
521 patient-derived system. We found specific efficacy of ribitol on FKRK patient hiPSCs, as  
522 evidenced by a complete rescue of glycosylated laminin-binding  $\alpha$ DG. There was  
523 minimal effect on LARGE and no effect on POMT2 patient hiPSCs, as would be  
524 expected from the location of these genetic forms in the pathway of  $\alpha$ DG glycosylation.  
525 In FKRK endoderm-free embryoid bodies, ribitol significantly upregulated glycosylated  
526  $\alpha$ DG at the laminin interface. There was also slightly increased accumulation of laminin  
527 at the embryoid body surface, but this *in vitro* system may lack the complexity or  
528 sensitivity to further detect functional improvements in an already relatively mild patient.

529 The FKRK patient in this study harbors a L276I mutation, the most common  
530 variant in the FKRK-related dystroglycanopathies [11]. We speculate that ribitol

531 supplementation may be a rational and effective treatment, in particular for mild-to-  
532 moderate FKRP and FKTN patients with residual ribitol transferase function that can be  
533 boosted by the additional supply of substrate. It remains to be investigated whether  
534 ribitol would also benefit additional groups of dystroglycanopathy patients. Collectively,  
535 these data establish a system to interrogate basal lamina structure and ECM receptor  
536 function in patient tissue, expanding the options for personalized phenotyping and drug  
537 evaluation in the dystroglycanopathies.

538 **Acknowledgements**

539 We would like to thank the patients and their families for their participation. We are  
540 grateful to Susan Cheng, Virginia Crocker, and Sandra Lara for their EM technical  
541 support. Electron microscopy was performed in the NINDS EM facility. This work was  
542 funded by the US National Institutes of Health Intramural Research Program in the  
543 National Institute of Neurological Disorders and Stroke.

544

545 **Conflict of interest**

546 The authors declare that they have no competing interests.

547

548 **Author contributions**

549 ARN, KZ, and CGB conceived and designed the study. ARN performed all experiments.  
550 MML contributed to data collection and image analyses. BSM assisted in developing the  
551 embryoid body protocol. ARN wrote the manuscript and all authors edited the  
552 manuscript.

## 553 **References**

554

- 555 1. Aida N, Tamagawa K, Takada K, Yagishita A, Kobayashi N, Chikumaru K,  
556 Iwamoto H (1996) Brain MR in Fukuyama congenital muscular dystrophy. *Am J*  
557 *Neuroradiol* 17:605–13
- 558 2. Booler HS, Pagalday-Vergara V, Williams JL, Hopkinson M, Brown SC (2016)  
559 Evidence of early defects in Cajal Retzius cell localisation during brain  
560 development in a mouse model of dystroglycanopathy. *Neuropathol Appl*  
561 *Neurobiol* 43:330–345. doi: 10.1111/ijlh.12426
- 562 3. Booler HS, Williams JL, Hopkinson M, Brown SC (2015) Degree of Cajal-Retzius  
563 cell mislocalisation correlates with the severity of structural brain defects in mouse  
564 models of dystroglycanopathy. *Brain Pathol* 26:465–478. doi: 10.1111/bpa.12306
- 565 4. Briggs D., Strazzulli A, Moracci M, Yu L, Yoshida-Moriguchi T, Zheng T, Venzke  
566 D, Anderson M, Hohenester E, Campbell KP (2016) Structural basis of laminin  
567 binding to the LARGE glycans on dystroglycan. *Nat Chem Biol* 12:810–814. doi:  
568 10.2210/PDB5IK7/PDB
- 569 5. Cataldi MP, Lu P, Blaeser A, Lu QL (2018) Ribitol restores functionally  
570 glycosylated  $\alpha$ -dystroglycan and improves muscle function in dystrophic FKRP-  
571 mutant mice. *Nat Commun* 9:3448. doi: 10.1038/s41467-018-05990-z
- 572 6. Chan FL, Inoue S (1994) Lamina lucida of basement membrane: An artefact.  
573 *Microsc Res Tech* 28:48–59. doi: 10.1002/jemt.1070280106
- 574 7. Clement E, Mercuri E, Godfrey C, Smith J, Robb S, Kinali M, Straub V, Bushby K,  
575 Manzur A, Talim B, Cowan F, Quinlivan R, Klein A, Longman C, McWilliam R,  
576 Topaloglu H, Mein R, Abbs S, North K, Barkovich AJ, Rutherford M, Muntoni F  
577 (2008) Brain involvement in muscular dystrophies with defective dystroglycan  
578 glycosylation. *Ann Neurol* 64:573–582. doi: 10.1002/ana.21482
- 579 8. Clement EM, Feng L, Mein R, Sewry CA, Robb SA, Manzur AY, Mercuri E,  
580 Godfrey C, Cullup T, Abbs S, Muntoni F (2012) Relative frequency of congenital  
581 muscular dystrophy subtypes: Analysis of the UK diagnostic service 2001-2008.  
582 *Neuromuscul Disord* 22:522–527. doi: 10.1016/j.nmd.2012.01.010
- 583 9. Cote PD, Moukhles H, Lindenbaum M, Carbonetto S (1999) Chimaeric mice  
584 deficient in dystroglycans develop muscular dystrophy and have disrupted  
585 myoneural synapses. *Nat Genet* 23:338–342. doi: 10.1038/15519
- 586 10. Devisme L, Bouchet C, Gonzalès M, Alanio E, Bazin A, Bessières B, Bigi N,  
587 Blanchet P, Bonneau D, Bonnières M, Bucourt M, Carles D, Clarisse B, Delahaye  
588 S, Fallet-Bianco C, Figarella-Branger D, Gaillard D, Gasser B, Delezoide A-L,  
589 Guimiot F, Joubert M, Laurent N, Laquerrière A, Liprandi A, Loget P, Marcorelles  
590 P, Martinovic J, Menez F, Patrier S, Pelluard F, Perez M-J, Rouleau C, Triau S,

- 591 Attié-Bitach T, Vuillaumier-Barrot S, Seta N, Encha-Razavi F (2012) Cobblestone  
592 lissencephaly: neuropathological subtypes and correlations with genes of  
593 dystroglycanopathies. *Brain* 135:469–482. doi: 10.1093/brain/awr357
- 594 11. Frosk P, Greenberg CR, Tennese AAP, Lamont R, Nylén E, Hirst C, Frappier D,  
595 Roslin NM, Zaik M, Bushby K, Straub V, Zatz M, De Paula F, Morgan K, Fujiwara  
596 TM, Wrogemann K (2005) The most common mutation in FKRP causing limb  
597 girdle muscular dystrophy type 21 (LGMD2I) may have occurred only once and is  
598 present in Hutterites and other populations. *Hum Mutat* 25:38–44. doi:  
599 10.1002/humu.20110
- 600 12. Garcia KE, Robinson EC, Alexopoulos D, Dierker DL, Glasser MF, Coalson TS,  
601 Ortinau CM, Rueckert D, Taber LA, Van Essen DC, Rogers CE, Smyser CD,  
602 Bayly P V. (2018) Dynamic patterns of cortical expansion during folding of the  
603 preterm human brain. *Proc Natl Acad Sci* 115:3156–3161. doi:  
604 10.1073/pnas.1715451115
- 605 13. Gerin I, Ury B, Breloy I, Bouchet-Seraphin C, Bolsée J, Halbout M, Graff J,  
606 Vertommen D, Muccioli GG, Seta N, Cuisset J-M, Dabaj I, Quijano-Roy S, Grahn  
607 A, Van Schaffingen E, Bommer GT (2016) ISPD produces CDP-ribitol used by  
608 FKTN and FKRP to transfer ribitol phosphate onto  $\alpha$ -dystroglycan. *Nat Commun*  
609 7:11534. doi: 10.1038/ncomms11534
- 610 14. Goddeeris MM, Wu B, Venzke D, Yoshida-Moriguchi T, Saito F, Matsumura K,  
611 Moore SA, Campbell KP (2013) LARGE glycans on dystroglycan function as a  
612 tunable matrix scaffold to prevent dystrophy. *Nature* 503:136–140. doi:  
613 10.1038/nature12605
- 614 15. Godfrey C, Foley AR, Clement E, Muntoni F (2011) Dystroglycanopathies: coming  
615 into focus. *Curr Opin Genet Dev* 21:278–285. doi: 10.1016/j.gde.2011.02.001
- 616 16. Graham SJL, Wicher KB, Jedrusik A, Guo G, Herath W, Robson P, Zernicka-  
617 Goetz M (2014) BMP signalling regulates the pre-implantation development of  
618 extra-embryonic cell lineages in the mouse embryo. *Nat Commun* 5:5667. doi:  
619 10.1038/ncomms6667
- 620 17. Graziano A, Messina S, Bruno C, Pegoraro E, Magri F (2015) Prevalence of  
621 congenital muscular dystrophy in Italy: A population study. *Neurology* 84:904–  
622 911. doi: 10.1212/WNL.0000000000001303
- 623 18. Grunseich C, Zukosky K, Kats IR, Ghosh L, Harmison GG, Bott LC, Rinaldi C,  
624 Chen K, Chen G, Boehm M, Fischbeck KH (2014) Stem cell-derived motor  
625 neurons from spinal and bulbar muscular atrophy patients. *Neurobiol Dis* 70:12–  
626 20. doi: 10.1016/j.nbd.2014.05.038
- 627 19. Halfter W, Dong S, Yip Y-P, Willem M, Mayer U (2002) A critical function of the  
628 pial basement membrane in cortical histogenesis. *J Neurosci* 22:6029–6040. doi:  
629 20026580

- 630 20. Han R, Kanagawa M, Yoshida-Moriguchi T, Rader EP, Ng RA, Michele DE,  
631 Muirhead DE, Kunz S, Moore SA, Iannaccone ST, Miyake K, McNeil PL, Mayer U,  
632 Oldstone MBA, Faulkner JA, Campbell KP (2009) Basal lamina strengthens cell  
633 membrane integrity via the laminin G domain-binding motif of  $\alpha$ -dystroglycan.  
634 *Proc Natl Acad Sci* 106:12573–12579. doi: 10.1073/pnas.0906545106
- 635 21. Henry MD, Campbell KP (1998) A Role for Dystroglycan in Basement Membrane  
636 Assembly. *Cell* 95:859–870. doi: 10.1016/S0092-8674(00)81708-0
- 637 22. Herrera B, Inman GJ (2009) A rapid and sensitive bioassay for the simultaneous  
638 measurement of multiple bone morphogenetic proteins. Identification and  
639 quantification of BMP4, BMP6 and BMP9 in bovine and human serum. *BMC Cell*  
640 *Biol* 10:20. doi: 10.1186/1471-2121-10-20
- 641 23. Hu H, Candiello J, Zhang P, Ball SL, Cameron D a, Halfter W (2010) Retinal  
642 ectopias and mechanically weakened basement membrane in a mouse model of  
643 muscle-eye-brain (MEB) disease congenital muscular dystrophy. *Mol Vis*  
644 16:1415–1428
- 645 24. Hu H, Yang Y, Eade A, Xiong Y, Qi Y (2007) Breaches of the Pial Basement  
646 Membrane and Disappearance of the Glia Limitans During Development Underlie  
647 the Cortical Lamination Defect in the Mouse Model of Muscle-Eye-Brain Disease.  
648 *J Comp Neurol* 502:168–183. doi: 10.1002/cne
- 649 25. Ishii H, Hayashi YK, Nonaka I, Arahata K (1997) Electron microscopic  
650 examination of basal lamina in Fukuyama congenital muscular dystrophy.  
651 *Neuromuscul Disord* 7:191–7
- 652 26. Jensen BS, Willer T, Saade DN, Cox MO, Mozaffar T, Scavina M, Stefans VA,  
653 Winder TL, Campbell KP, Steven A, Mathews KD (2015) GMPPB-Associated  
654 Dystroglycanopathy: Emerging Common Variants with Phenotype Correlation.  
655 *Hum Mutat.* doi: 10.1002/humu.22898
- 656 27. Kanagawa M, Kobayashi K, Tajiri M, Manya H, Kuga A, Yamaguchi Y (2016)  
657 Identification of a Post-translational Modification with Ribitol-Phosphate and Its  
658 Defect in Muscular Dystrophy. *Cell Rep* 14:2209–2223. doi:  
659 10.1016/j.celrep.2016.02.017
- 660 28. Kurosawa H (2007) Methods for inducing embryoid body formation: in vitro  
661 differentiation system of embryonic stem cells. *J Biosci Bioeng* 103:389–398. doi:  
662 10.1263/jbb.103.389
- 663 29. Li S, Edgar D, Fässler R, Wadsworth W, Yurchenco PD (2003) The role of laminin  
664 in embryonic cell polarization and tissue organization. *Dev Cell* 4:613–624. doi:  
665 10.1016/S1534-5807(03)00128-X
- 666 30. Li S, Harrison D, Carbonetto S, Fässler R, Smyth N, Edgar D, Yurchenco PD  
667 (2002) Matrix assembly, regulation, and survival functions of laminin and its  
668 receptors in embryonic stem cell differentiation. *J Cell Biol* 157:1279–1290. doi:

- 669 10.1083/jcb.200203073
- 670 31. Li S, Qi Y, McKee K, Liu J, Hsu J, Yurchenco PD (2017) Integrin and dystroglycan  
671 compensate each other to mediate laminin-dependent basement membrane  
672 assembly and epiblast polarization. *Matrix Biol* 57:272–284. doi:  
673 10.1016/j.matbio.2016.07.005
- 674 32. Lippmann ES, Estevez-Silva MC, Ashton RS (2014) Defined human pluripotent  
675 stem cell culture enables highly efficient neuroepithelium derivation without small  
676 molecule inhibitors. *Stem Cells* 32:1032–1042. doi: 10.1002/stem.1622
- 677 33. Meilleur KG, Zukosky K, Medne L, Fequiere P, Powell-Hamilton N, Winder TL,  
678 Alsaman A, El-Hattab AW, Dastgir J, Hu Y, Donkervoort S, Golden JA, Eagle R,  
679 Finkel R, Scavina M, Hood IC, Rorke-Adams LB, Bönnemann CG (2014) Clinical,  
680 Pathologic, and Mutational Spectrum of Dystroglycanopathy Caused by LARGE  
681 Mutations. *J Neuropathol Exp Neurol* 73:425–441
- 682 34. Michele DE, Barresi R, Kanagawa M, Saito F, Cohn RD, Satz JS, Dollar J,  
683 Nishino I, Kelley RI, Somer H, Straub V, Mathews KD, Moore SA, Campbell KP  
684 (2002) Post-translational disruption of dystroglycan-ligand interactions in  
685 congenital muscular dystrophies. *Nature* 418:417–421. doi: 10.1038/nature00837
- 686 35. Moore SA, Saito F, Chen J, Michele DE, Henry MD, Messing A, Cohn RD, Ross-  
687 Barta SE, Westra S, Williamson RA, Hoshi T, Campbell KP (2002) Deletion of  
688 brain dystroglycan recapitulates aspects of congenital muscular dystrophy. *Nature*  
689 418:422–425. doi: 10.1038/nature00838
- 690 36. Morrissey MA, Sherwood DR (2015) An active role for basement membrane  
691 assembly and modification in tissue sculpting. *J Cell Sci* 128:1661–1668. doi:  
692 10.1242/jcs.168021
- 693 37. Nakagawa N, Yagi H, Kato K, Takematsu H, Oka S (2015) Ectopic clustering of  
694 Cajal–Retzius and subplate cells is an initial pathological feature in *Pomgnt2*-  
695 knockout mice, a model of dystroglycanopathy. *Sci Rep* 5:11163. doi:  
696 10.1038/srep11163
- 697 38. Nickolls AR, Bönnemann CG (2018) The roles of dystroglycan in the nervous  
698 system: insights from animal models of muscular dystrophy. *Dis Model Mech*  
699 11:dmm035931. doi: 10.1242/dmm.035931
- 700 39. Peng HB, Ali A, Daggett DF, Rauvala H, Hassell JR, Smalheiser NR (1998) The  
701 relationship between perlecan and dystroglycan and its implication in the  
702 formation of the neuromuscular junction. *Cell Adhes Commun* 5:475–489. doi:  
703 10.3109/15419069809005605
- 704 40. Praissman JL, Willer T, Sheikh MO, Toi A, Chitayat D, Lin Y-Y, Lee H, Stalnaker  
705 SH, Wang S, Prabhakar PK, Nelson SF, Stemple DL, Moore SA, Moremen KW,  
706 Campbell KP, Wells L (2016) The functional O-mannose glycan on alpha-  
707 dystroglycan contains a phospho-ribitol primed for matriglycan addition. *Elife*



- 708 5:e14473. doi: 10.7554/eLife.14473
- 709 41. Sanes JR (1982) Laminin, fibronectin, and collagen in synaptic and extrasynaptic  
710 portions of muscle fiber basement membrane. *J Cell Biol* 93:442–451. doi:  
711 10.1083/jcb.93.2.442
- 712 42. Schittny JC, Timpl R, Engel J (1988) High resolution immunoelectron microscopic  
713 localization of functional domains of laminin, nidogen, and heparan sulfate  
714 proteoglycan in epithelial basement membrane of mouse cornea reveals different  
715 topological orientations. *J Cell Biol* 107:1599–1610. doi: 10.1083/jcb.107.4.1599
- 716 43. Sudo A, Kanagawa M, Kondo M, Chiyomi I, Kobayashi K, Endo M, Minami Y,  
717 Aiba A, Toda T (2018) Temporal requirement of dystroglycan glycosylation during  
718 brain development and rescue of severe cortical dysplasia via gene delivery in the  
719 fetal stage. *Hum Mol Genet* 27:1174–1185. doi: 10.1093/hmg/ddx143
- 720 44. Talts JF, Andac Z, Göhring W, Brancaccio A, Timpl R (1999) Binding of the G  
721 domains of laminin  $\alpha$ 1 and  $\alpha$ 2 chains and perlecan to heparin, sulfatides,  $\alpha$ -  
722 dystroglycan and several extracellular matrix proteins. *EMBO J* 18:863–870. doi:  
723 10.1093/emboj/18.4.863
- 724 45. Ungrin MD, Joshi C, Nica A, Bauwens C, Zandstra PW (2008) Reproducible, ultra  
725 high-throughput formation of multicellular organization from single cell  
726 suspension-derived human embryonic stem cell aggregates. *PLoS One* 3. doi:  
727 10.1371/journal.pone.0001565
- 728 46. Vajsar J, Ackerley C, Chitayat D, Becker LE (2000) Basal lamina abnormality in  
729 the skeletal muscle of Walker-Warburg syndrome. *Pediatr Neurol* 22:139–143.  
730 doi: 10.1016/S0887-8994(99)00129-0
- 731 47. Winograd-Katz SE, Fässler R, Geiger B, Legate KR (2014) The integrin  
732 adhesome: From genes and proteins to human disease. *Nat Rev Mol Cell Biol*  
733 15:273–288. doi: 10.1038/nrm3769
- 734 48. Yamamoto T, Toyoda C, Kobayashi M, Kondo E, Saito K, Osawa M (1997) Pial-  
735 glial barrier abnormalities in fetuses with Fukuyama congenital muscular  
736 dystrophy. *Brain Dev* 19:35–42. doi: 10.1016/s0387-7604(96)00056-3
- 737 49. Yoshida-Moriguchi T, Campbell KP (2015) Matriglycan: a novel polysaccharide  
738 that links dystroglycan to the basement membrane. *Glycobiology* 25:702–713.  
739 doi: 10.1093/glycob/cwv021
- 740 50. Yoshioka M, Kobayashi K, Toda T (2017) Novel FKRPs mutations in a Japanese  
741 MDC1C sibship clinically diagnosed with Fukuyama congenital muscular  
742 dystrophy. *Brain Dev* 39:869–872. doi: 10.1016/j.braindev.2017.05.013
- 743 51. Yurchenco PD (2011) Basement Membranes: Cell Scaffoldings and Signaling  
744 Platforms. *Cold Spring Harb Perspect Biol* 3:a004911. doi:  
745 10.1101/cshperspect.a004911



- 746 52. Zhang P, Yang Y, Candiello J, Thorn TL, Gray N, Halfter WM, Hu H (2013)  
747 Biochemical and biophysical changes underlie the mechanisms of basement  
748 membrane disruptions in a mouse model of dystroglycanopathy. *Matrix Biol*  
749 32:196–207. doi: 10.1016/j.matbio.2013.02.002

750

751 **Tables**

752

753 **Table 1**

754 **Characteristics of study subjects**

| <b>Subject</b>   | <b>Age</b> | <b>Gender</b> | <b>Clinical presentation</b>                                                                                                                                                                                        | <b>Diagnosis</b>                                   | <b>Genotype</b>                                                     |
|------------------|------------|---------------|---------------------------------------------------------------------------------------------------------------------------------------------------------------------------------------------------------------------|----------------------------------------------------|---------------------------------------------------------------------|
| <b>Control-1</b> | Neonate    | Male          | N/A                                                                                                                                                                                                                 | N/A                                                | N/A                                                                 |
| <b>Control-2</b> | Neonate    | Male          | N/A                                                                                                                                                                                                                 | N/A                                                | N/A                                                                 |
| <b>Control-3</b> | 51         | Female        | N/A                                                                                                                                                                                                                 | N/A                                                | N/A                                                                 |
| <b>LARGE</b>     | 6          | Female        | Delayed motor milestones, weakness and general hypotonia, able to walk stairs, mild autistic behavior, mild muscle biopsy, lissencephaly on brain MRI                                                               | Congenital muscular dystrophy type 1D              | LARGE1: Heterozygous<br>- Exon 7 deletion<br>- Exons 3 – 7 deletion |
| <b>FKRP</b>      | 3          | Male          | Delayed motor milestones, mild weakness, trunk hypotonia, waddling gait, able to run, mild autistic behavior, moderate dystrophy on muscle biopsy, normal basement membrane on TEM                                  | Early onset limb-girdle muscular dystrophy type 2I | FKRP: Heterozygous<br>- c.C826A (p.L276I)<br>- c.G534T (p.W178C)    |
| <b>POMT2</b>     | 4 ½        | Female        | Severely delayed motor milestones, hip dysplasia at birth, weakness and general hypotonia, unable to stand, joint contractures, failure to thrive, delayed speech acquisition, white matter hyperintensities on MRI | Muscle-Eye-Brain Disease                           | POMT2: Homozygous<br>- c.G1057A (p.G353S)                           |

755 Age in years; TEM, transmission electron microscopy; MRI, magnetic resonance imaging

756 **Table 2**

757 **Antibodies for immunofluorescence and western blots**

| <b>Antibody</b>                                | <b>Dilution</b>              | <b>Company</b>        | <b>Catalog Number</b> |
|------------------------------------------------|------------------------------|-----------------------|-----------------------|
| <b>SOX17</b>                                   | 1:100                        | Abcam                 | ab84990               |
| <b>OCT4</b>                                    | 1:200                        | Abcam                 | ab134218              |
| <b>Laminin</b>                                 | 1:1,000 (IF)<br>1:5,000 (WB) | Sigma-Aldrich         | L9393                 |
| <b>Glyco-<math>\alpha</math>DG</b><br>(IIH6C4) | 1:200 (IF)<br>1:1,000 (WB)   | Millipore             | 05-593                |
| <b>Core-<math>\alpha</math>DG</b>              | 1:500                        | R&D Systems           | AF6868                |
| <b><math>\beta</math>DG</b>                    | 1:10,000                     | GeneTex               | GTX124225             |
| <b>Nestin</b>                                  | 1:500                        | Millipore             | ABD69                 |
| <b>SSEA3</b>                                   | 1:200                        | Abcam                 | ab16286               |
| <b>SSEA4</b>                                   | 1:500                        | STEMCELL Technologies | 60062                 |
| <b>F-actin</b><br>(Phalloidin-647)             | 1:100                        | Thermo Fisher         | A22287                |
| <b>Perlecan</b>                                | 1:100                        | Millipore             | MAB1948-P             |
| <b>Nidogen</b>                                 | 1:50                         | R&D Systems           | MAB2570               |
| <b>COLIV</b>                                   | 1:1,000                      | Chemicon              | MAB1430               |
| <b>HuNu</b>                                    | 1:100                        | Millipore             | MAB1281               |

758

759 IF, immunofluorescence; WB, western blot

760 **Figure legends**

761

762 **Fig. 1**

763 **Self-Organization of Basal Lamina-Containing Embryoid Bodies from Human**  
764 **hiPSCs.**

765 (a) Schematic of embryoid body differentiation protocol from feeder-dependent hiPSCs.  
766 X-VIVO refers to X-VIVO 10 medium (see experimental procedures). (b) Phase-contrast  
767 representation of embryoid body differentiation. hiPSCs were seeded on day 0 in a  
768 microwell plate to form spheroids of roughly 2,000 cells on day 1. The spheroids were  
769 then maintained in suspension culture until day 5. Scale bars, 500  $\mu\text{m}$ . (c) Phase-  
770 contrast and immunohistochemistry on day 5 embryoid bodies showing two distinct  
771 tissue domains, with a basal lamina in contact with the interior OCT4+ cells expressing  
772 glycosylated  $\alpha\text{DG}$  (glyco- $\alpha\text{DG}$ ). Scale bars, 50  $\mu\text{m}$ .

773

774 **Fig. 2**

775 **Culture Conditions Impact the Lineage Outcome of Human hiPSC-Derived**  
776 **Embryoid Bodies**

777 (a) Phase-contrast and immunohistochemistry of hiPSC spheroids maintained in 20%  
778 serum-replacement medium for 5 days. Feeder-dependent spheroids were derived from  
779 hiPSCs cultured on a feeder layer of MEFs for at least one passage. (b) Phase-contrast  
780 and immunohistochemistry of day 5 spheroids in serum-containing medium. Phase-  
781 contrast scale bars, 500  $\mu\text{m}$ ; fluorescence scale bars, 50  $\mu\text{m}$ .

782

783 **Fig. 3**

784 **Dystroglycanopathy Patient hiPSCs Express Hypoglycosylated Forms of  $\alpha$ DG**

785 (a) Immunocytochemistry and karyotype analyses of control and dystroglycanopathy  
786 patient-derived hiPSCs. Scale bars, 200  $\mu$ m. (b) Western blots on hiPSC protein  
787 lysates.  $\beta$ DG was used as a loading control. The asterisk indicates the molecular weight  
788 of endogenous laminin in the samples. Each lane represents one cell line (for controls)  
789 or one clone (for patients). (c, d) Quantification of western blots on glycosylated  $\alpha$ DG  
790 and the laminin overlay assay. Band intensity for each sample was normalized to  $\beta$ DG,  
791 and all samples are expressed as a percent of control. Three control cell lines and two  
792 clones per patient were used, n = 3 technical replicates per clone. Values expressed as  
793 mean  $\pm$  s.e.m. Post-hoc comparisons \* P < 0.05, \*\* P < 0.01, \*\*\*\* P < 0.0001.

794

795 **Fig. 4**

796 **hiPSCs from Dystroglycanopathy Patients Show Normal Germ Layer**  
797 **Differentiation**

798 (a) Immunocytochemistry of ectoderm markers. hiPSCs were differentiated via dual  
799 SMAD inhibition by treating with LDN-193189 and SB431542 for 6 days. (b) Mesoderm  
800 differentiation was mediated by Activin A and Wnt3a treatment. TBX1  
801 immunocytochemistry was performed after 2 days and GATA4 after 3 days. (c)  
802 Endoderm differentiation was also induced by Activin A and Wnt3a.  
803 Immunocytochemistry was performed after 3 days. hESC, H9 human embryonic stem  
804 cell line. Scale bars, 100  $\mu$ m.

805

806 **Fig. 5**

807 **Ultrastructural Basal Lamina Defects in Dystroglycanopathy Patient Embryoid**  
808 **Bodies**

809 **(a-c)** Representative immunohistochemistry images of control and patient embryoid  
810 bodies at day 5 of differentiation. At least three independent differentiations were carried  
811 out on each of three control hiPSC lines and two hiPSC clones from the LARGE and  
812 POMT2 patient. Scale bars, 50  $\mu\text{m}$ . **(d)** Transmission electron micrographs of embryoid  
813 body basal lamina. Asterisk, nucleus; arrows, basal lamina; arrowheads, plasma  
814 membrane; scale bars, 500  $\mu\text{m}$ . **(e)** Measurements of basal lamina thickness. Three  
815 control lines and two clones each from the LARGE and POMT2 patients were used. For  
816 each clone, micrographs of  $n \geq 10$  different basal lamina regions were collected across  
817  $\geq 5$  embryoid bodies from 2-3 independent differentiations. Values displayed as mean  $\pm$   
818 s.e.m. Post-hoc comparisons \*\*  $P < 0.01$ , \*\*\*\*  $P < 0.0001$ .

819

820 **Fig. 6**

821 **Ultrastructural Examination of Embryoid Body Morphology**

822 Representative transmission electron micrographs depicting the ultrastructural  
823 morphology of embryoid body epithelium. Rare attachment of fibrillar matrix to the basal  
824 lamina indicated by asterisk. Arrows demonstrate epithelial tight junctions, and the  
825 arrow head indicates apical microvilli. Scale bar, 500 nm.

826

827 **Fig. 7**

828 **Analysis of Basal Lamina Components and Growth Characteristics of**  
829 **Dystroglycanopathy Embryoid Bodies**

830 (a) Representative antibody labeling to assess co-localization of laminin with other basal  
831 lamina constituents. Embryoid bodies from three controls and two clones per patient  
832 were used. Scale bar, 50  $\mu\text{m}$ . (b) Examples of occasionally separate localization of  
833 laminin, perlecan, and COLIV in POMT2 embryoid bodies. The arrow shows localization  
834 of perlecan outside the basal lamina. Arrowheads indicate the presence of laminin  
835 without perlecan or COLIV. Scale bar, 50  $\mu\text{m}$ . (c) Phase-contrast images of embryoid  
836 body differentiation on days 1, 3, and 5. Scale bar, 100  $\mu\text{m}$ . (d) Quantification of  
837 embryoid body size over time based on averaged cross-sectional area measurements  
838 in phase-contrast images from  $n = 3$  differentiations. At least 75 embryoid bodies per  
839 line were analyzed during each differentiation. No statistical significance was found  
840 between control and patient at any time point ( $P > 0.05$ ), values expressed as mean  $\pm$   
841 s.d.

842

## 843 **Fig. 8**

### 844 **Morphologically Mature Embryoid Bodies are Virtually Devoid of MEFs**

845 (a) Immunocytochemistry of feeder-dependent hiPSCs to distinguish human cells  
846 (HuNu) from MEFs. Control-1 hiPSCs and one hiPSC clone of the POMT2 patient were  
847 used. (b) Embryoid bodies at different time points, derived from control and POMT1  
848 hiPSCs. Scale bars, 100  $\mu\text{m}$ .

849

## 850 **Fig. 9**

### 851 **Assembly of Exogenous Laminin on Endoderm-Free Embryoid Bodies**

852 **(a, b)** Schematic and phase-contrast of endoderm-free embryoid body culture protocol.  
853 Feeder-free hiPSCs were seeded on day 0 in microwell plates to form spheroids of  
854 roughly 1,000 cells by day 1. The spheroids were transferred to suspension culture  
855 supplemented with laminin for 48 hours. **(c)** Immunohistochemistry demonstrating the  
856 effect of increasing laminin concentration on endoderm-free embryoid bodies. Embryoid  
857 bodies were supplemented with varying concentrations of laminin on day 1 and  
858 collected for analysis 48 hours later. Scale bars, 100  $\mu\text{m}$ .

859

## 860 **Fig. 10**

### 861 **Patient-Specific Differences in Laminin Assembly and Response to Ribitol** 862 **Treatment**

863 **(a)** Immunohistochemistry on day 3 endoderm-free embryoid bodies. Scale bar, 200  
864  $\mu\text{m}$ . **(b)** Western blotting of protein lysates from hiPSC cultures. hiPSCs were  
865 supplemented with daily medium changes with (+) or without (-) 3 mM ribitol for 72  
866 hours before protein was collected. Asterisk indicates the position of endogenous  
867 laminin. **(c)** Immunohistochemistry on day 3 endoderm-free embryoid bodies to assess  
868 the effect of ribitol treatment on the localization and glycosylation of  $\alpha\text{DG}$  in the FKRP  
869 patient. **(d)** Quantification of the percent embryoid body surface area covered by  
870 laminin. Three controls and two clones per patient were analyzed across  $n = 3$   
871 differentiations each. Values plotted as mean  $\pm$  s.e.m. Post-hoc comparisons \*\*  $P <$   
872 0.01, \*\*\*  $P < 0.001$ . **(e)** Quantification of glycosylated  $\alpha\text{DG}$  staining intensity at the  
873 embryoid body surface. Three controls and two FKRP clones with and without ribitol  
874 were analyzed and normalized to a percentage of the controls. For each clone,  $n = 27$



875 surface regions of 50  $\mu\text{m}$  length were quantified across three differentiations. Values  
876 graphed as mean  $\pm$  s.e.m. Post-hoc comparisons \*\*\*\* P < 0.0001.

877

878 **Fig. 11**

879 **Ribitol Treatment Promotes Functional Glycosylation of  $\alpha\text{DG}$  in FKRP hiPSCs**

880 **(a)** Additional western blots on control and FKRP patient hiPSCs. Cells were  
881 supplemented with 3 mM ribitol in daily medium changes for 72 hours before protein  
882 was harvested. Asterisks indicate position of endogenous laminin in the samples.  
883 Lipofectamine (Lipo.) (STEM00003, Thermo Fisher) was tested in conjunction with  
884 ribitol treatment to enhance delivery to cells. In this condition, ribitol and lipofectamine  
885 were administered for only 24 hours following manufacturer's instructions, and the cells  
886 were collected 72 hours later. No apparent difference was observed between 24-hour  
887 lipofectamine-delivered and 72 hour free-uptake of ribitol. **(b)** Daily administration of 3  
888 mM glycerol for 72 hours shows no effect on  $\alpha\text{DG}$  by western blot.

**Fig. 1**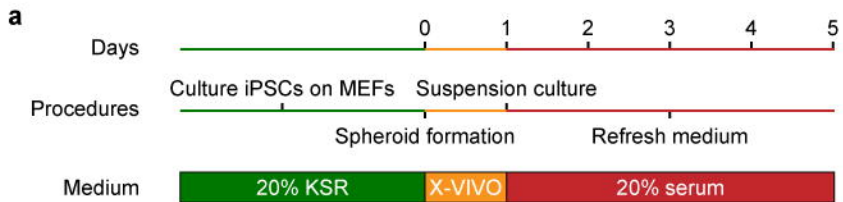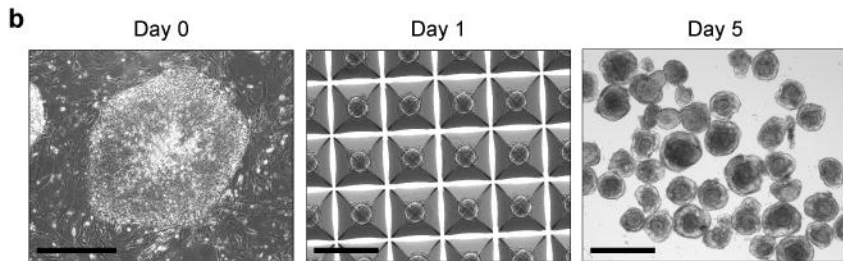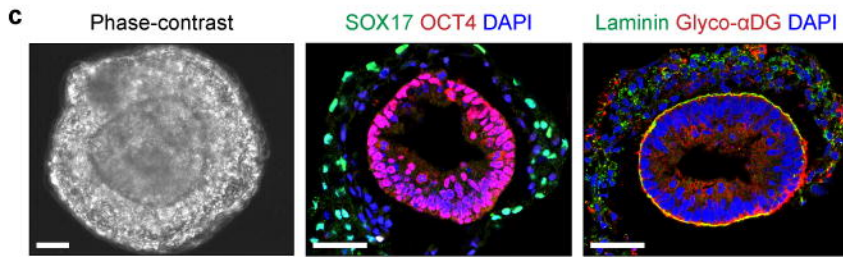

**Fig. 2**

**a**

Serum-replacement medium

Feeder-free

Feeder-dependent

Phase-contrast

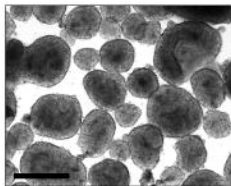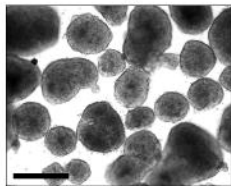

SOX17 Nestin DAPI

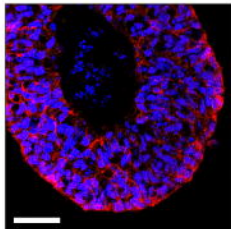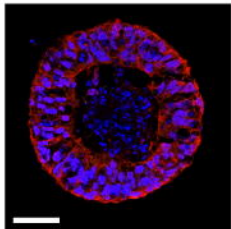

**b**

Serum-containing medium

Feeder-free

Feeder-dependent

Phase-contrast

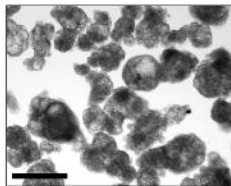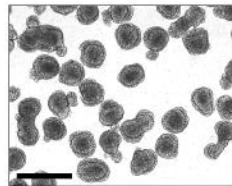

SOX17 OCT4 DAPI

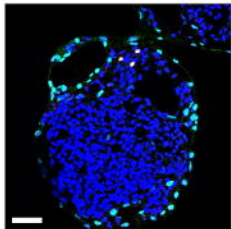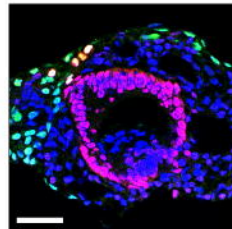

**Fig. 3**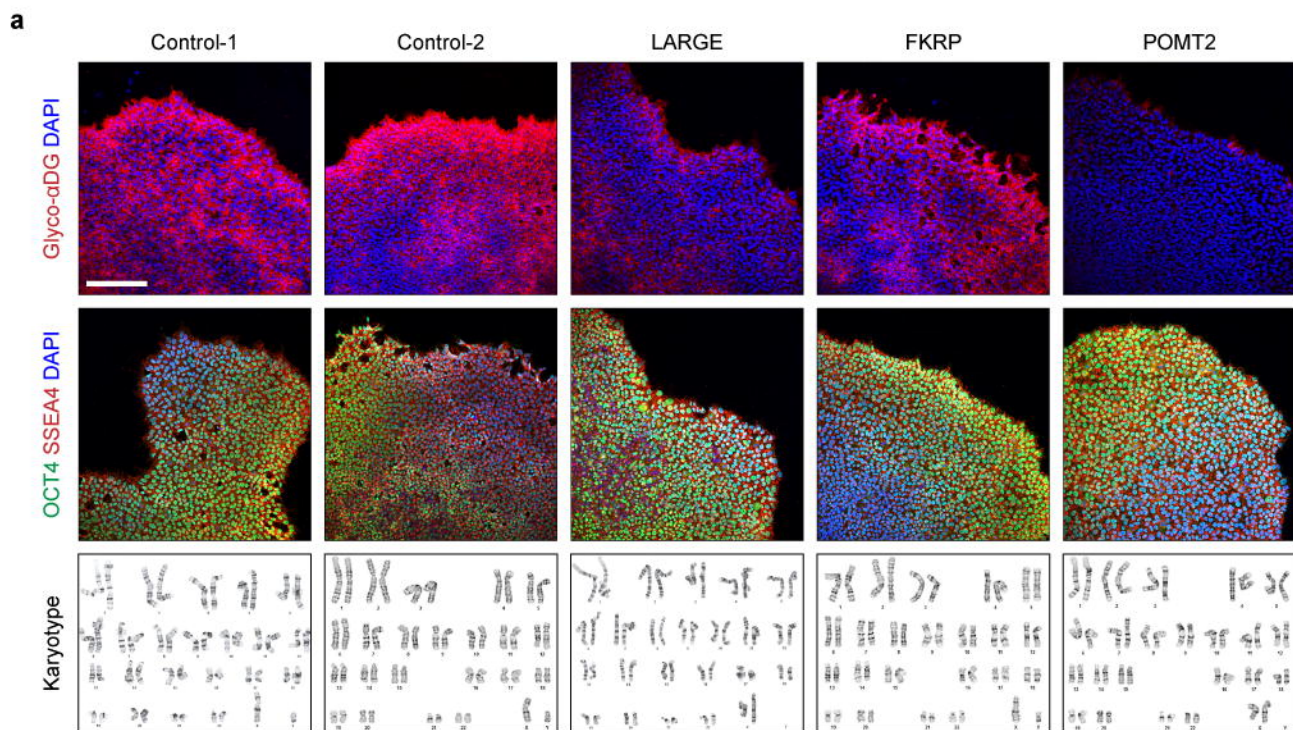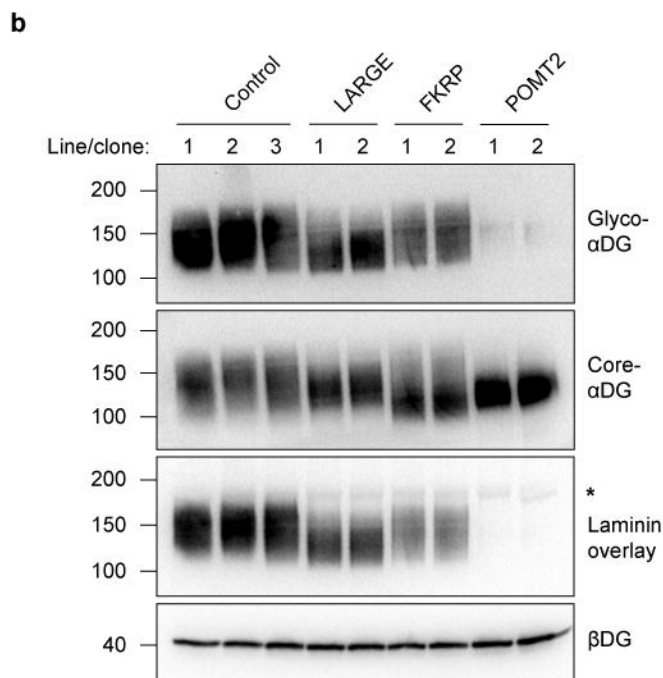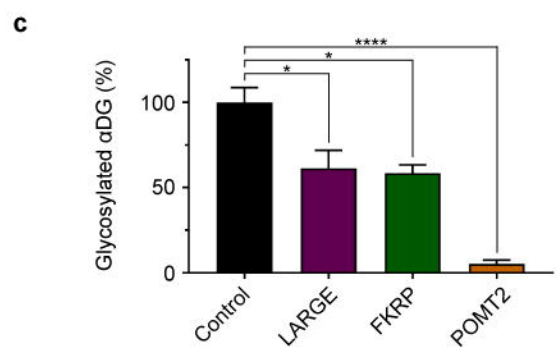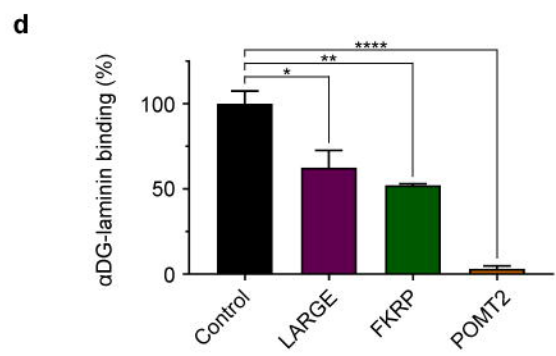



**Fig. 4**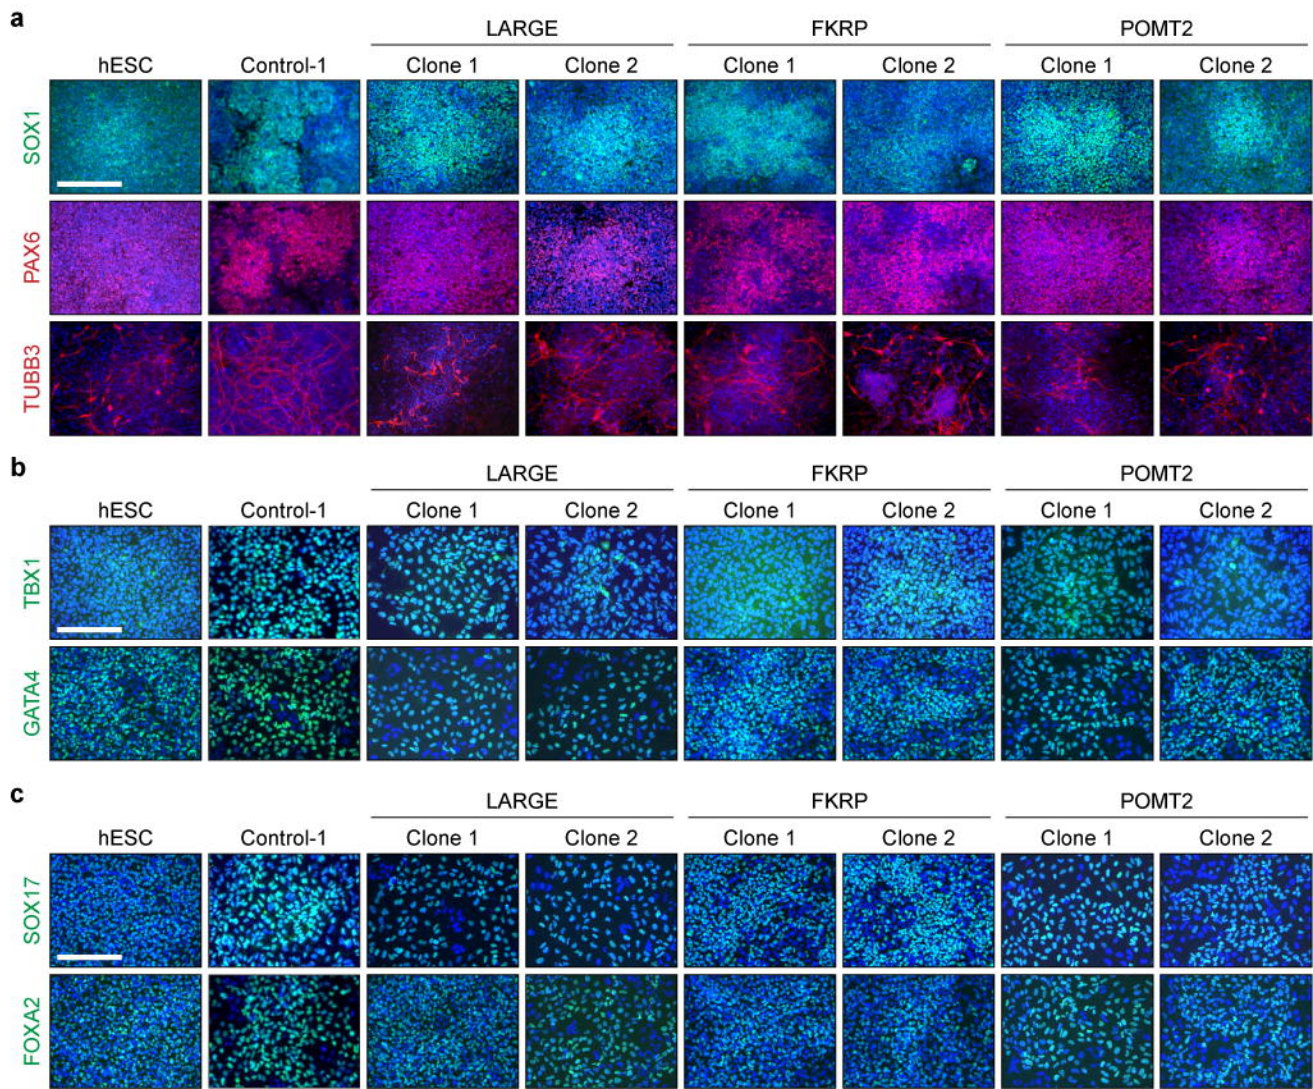

**Fig. 5**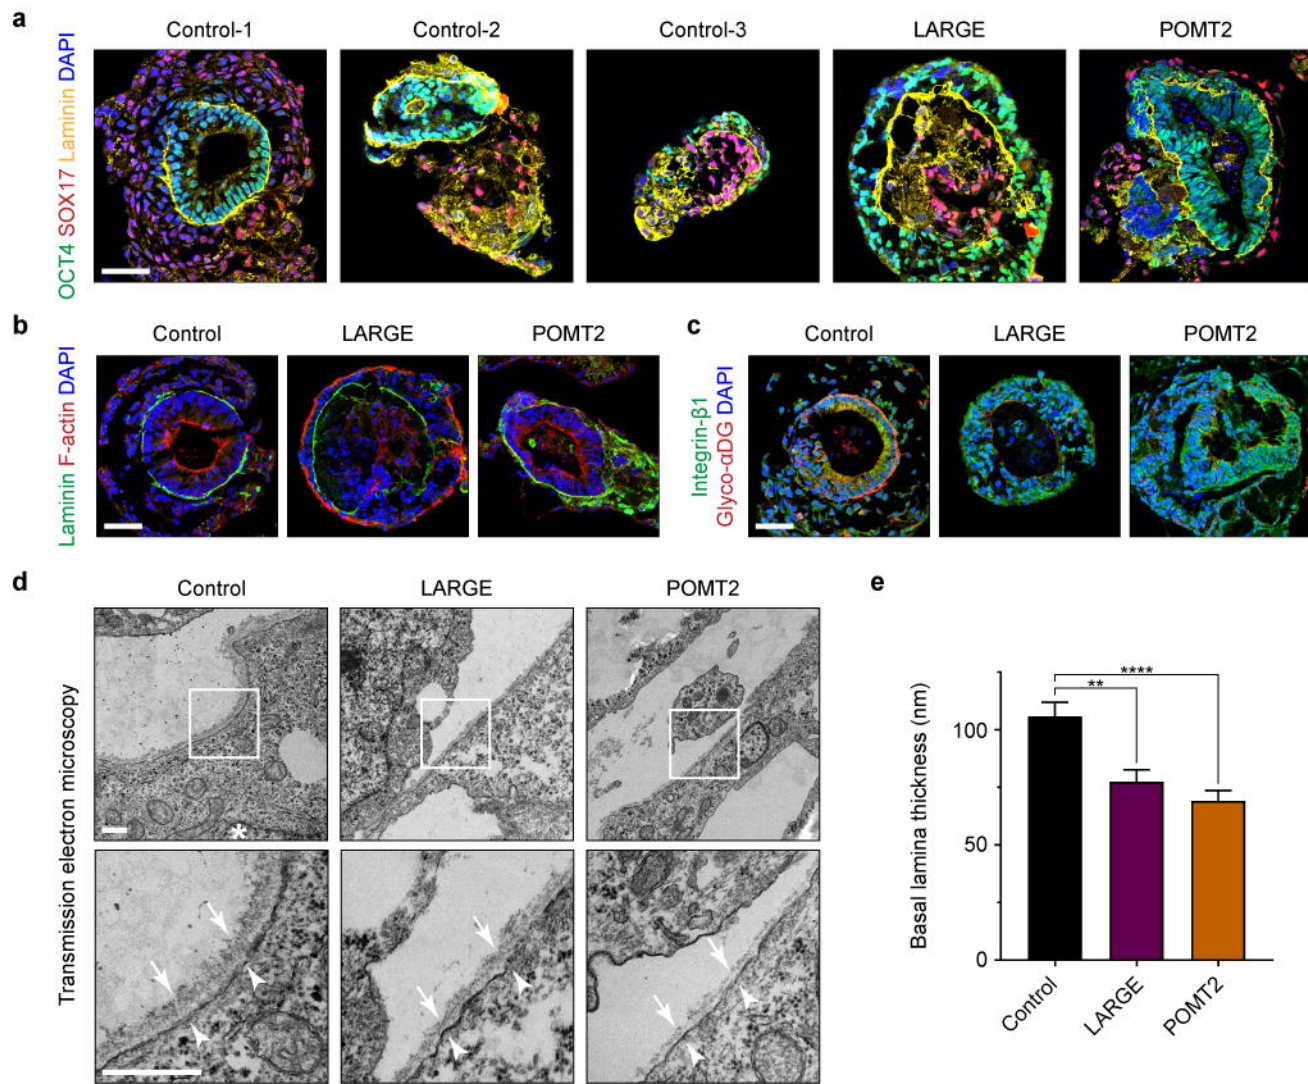

**Fig. 6**

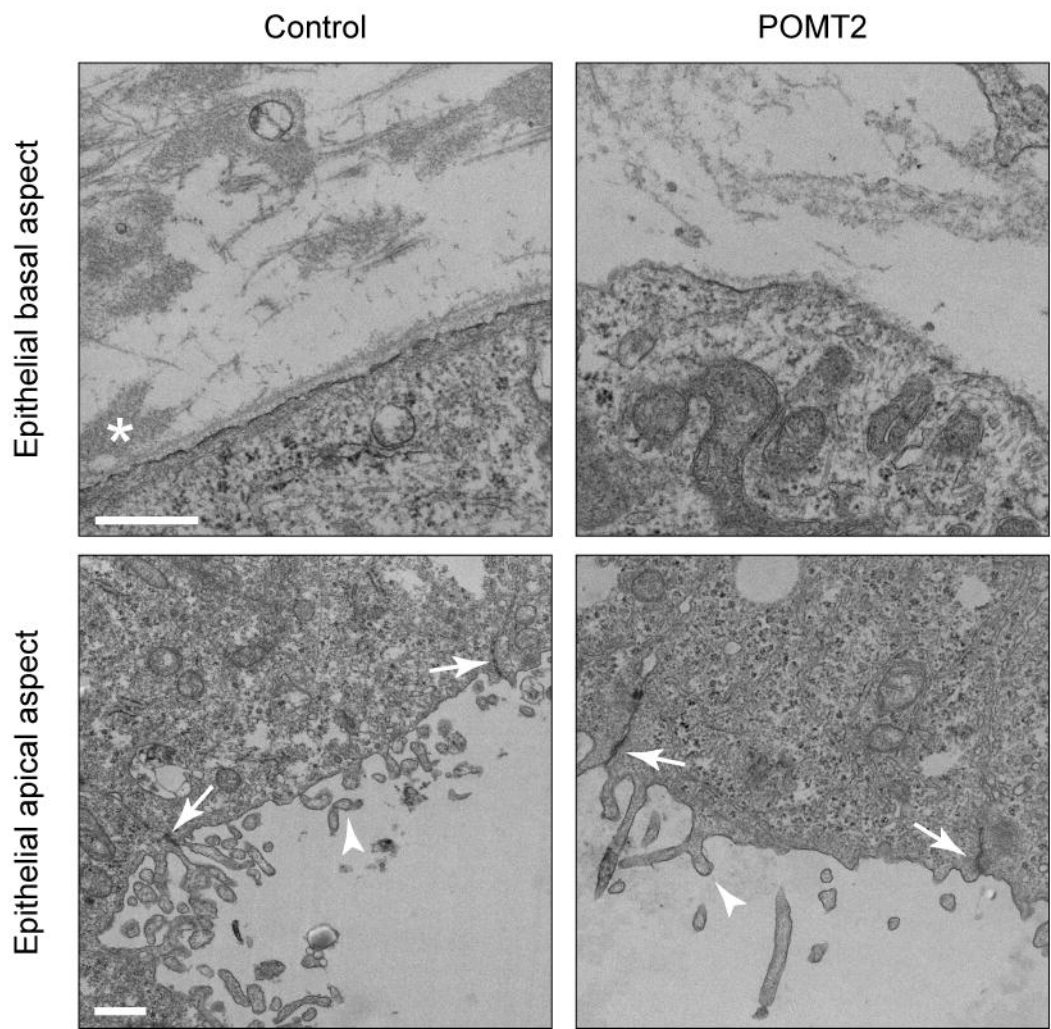



**Fig. 7**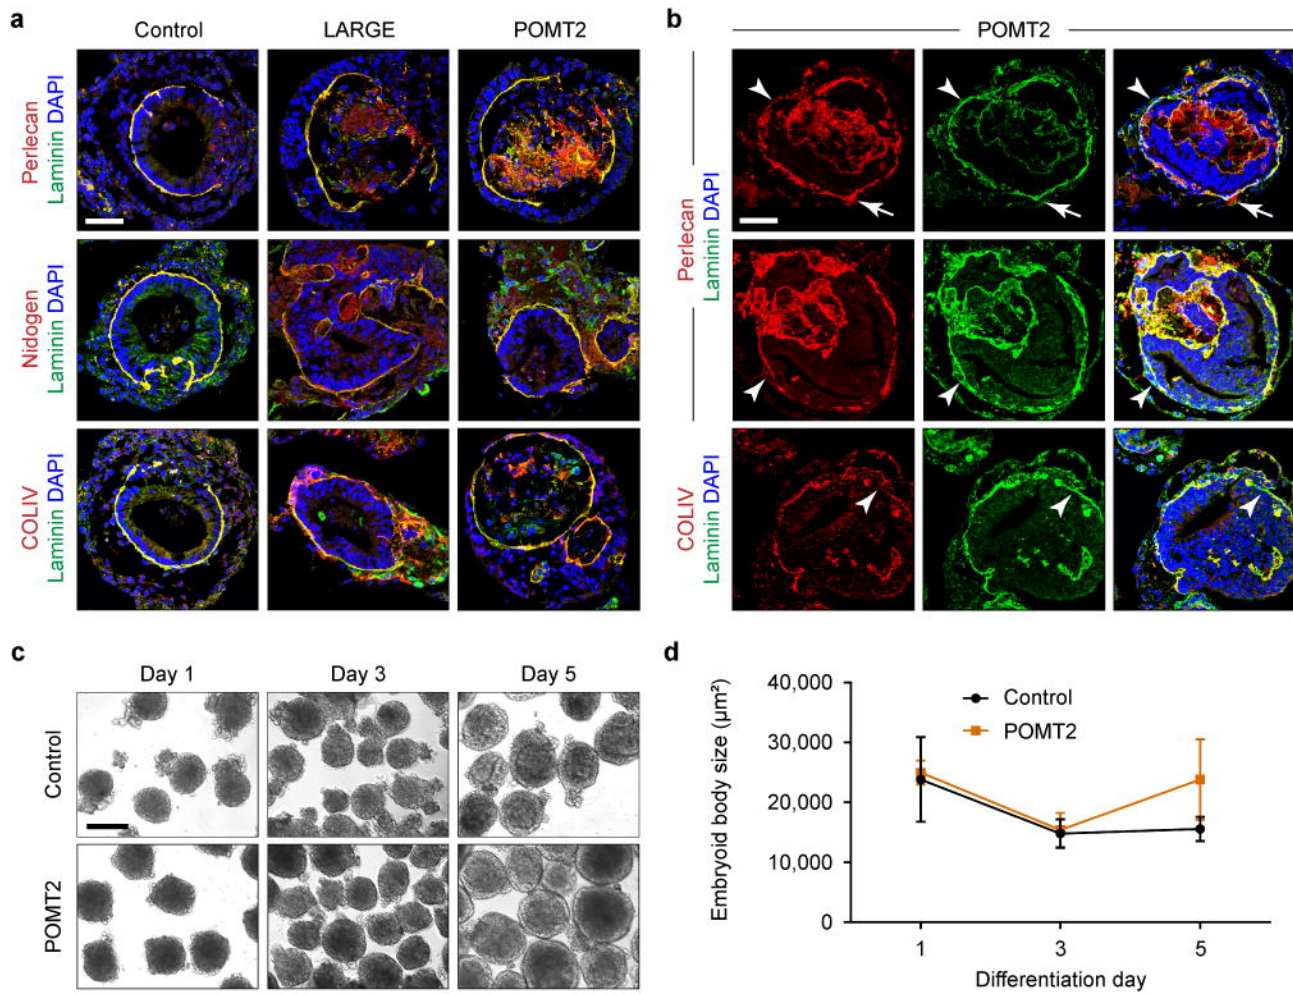



**Fig. 8**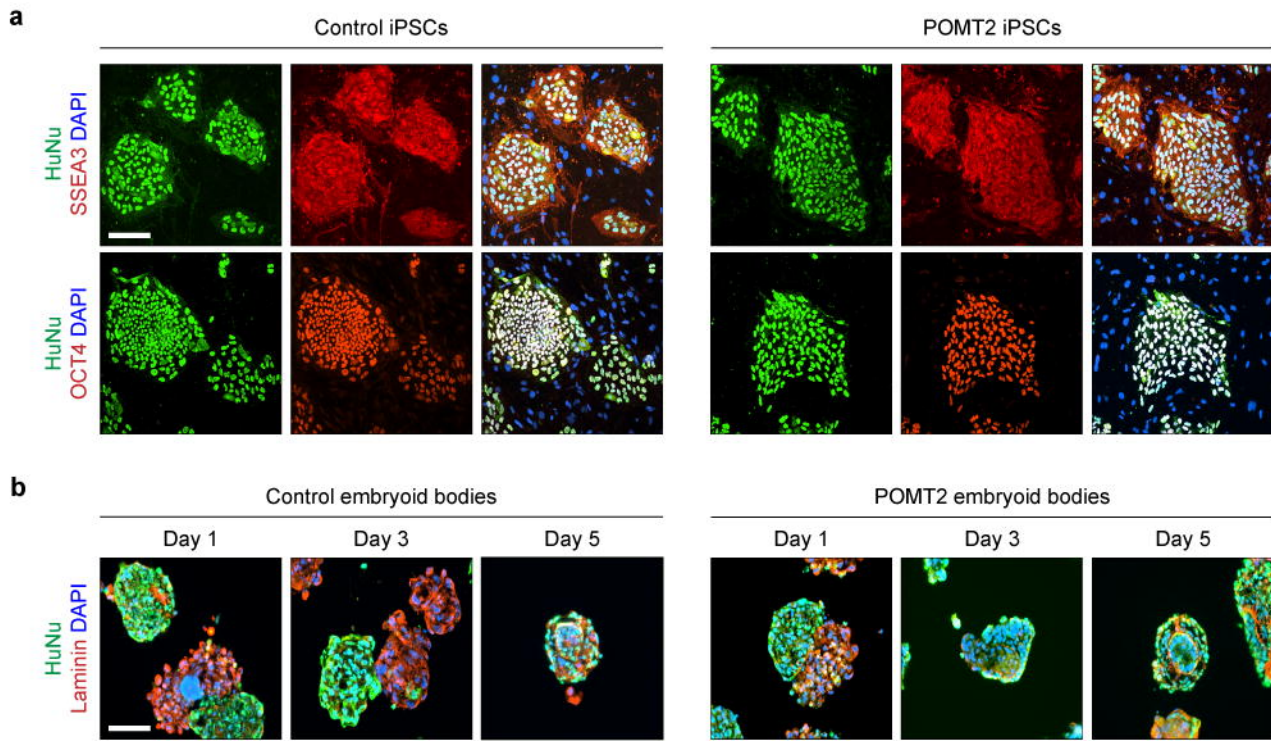

**Fig. 9**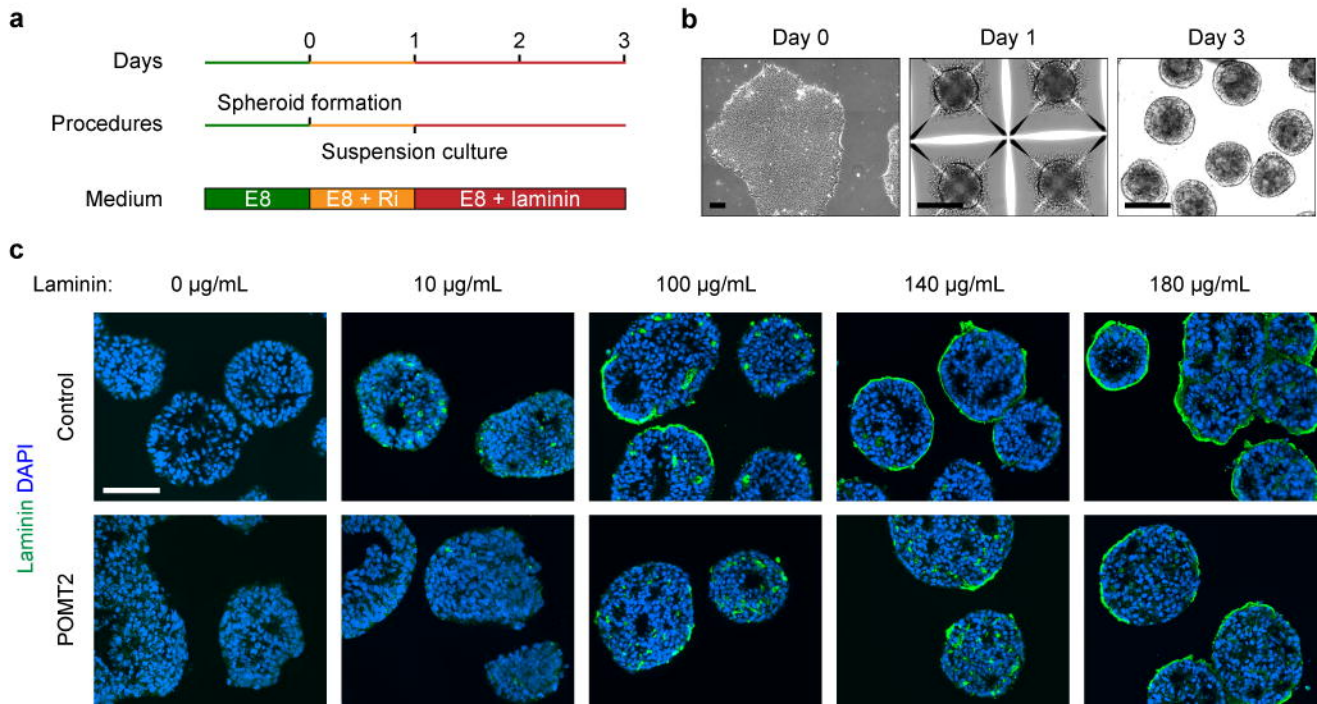

**Fig. 10**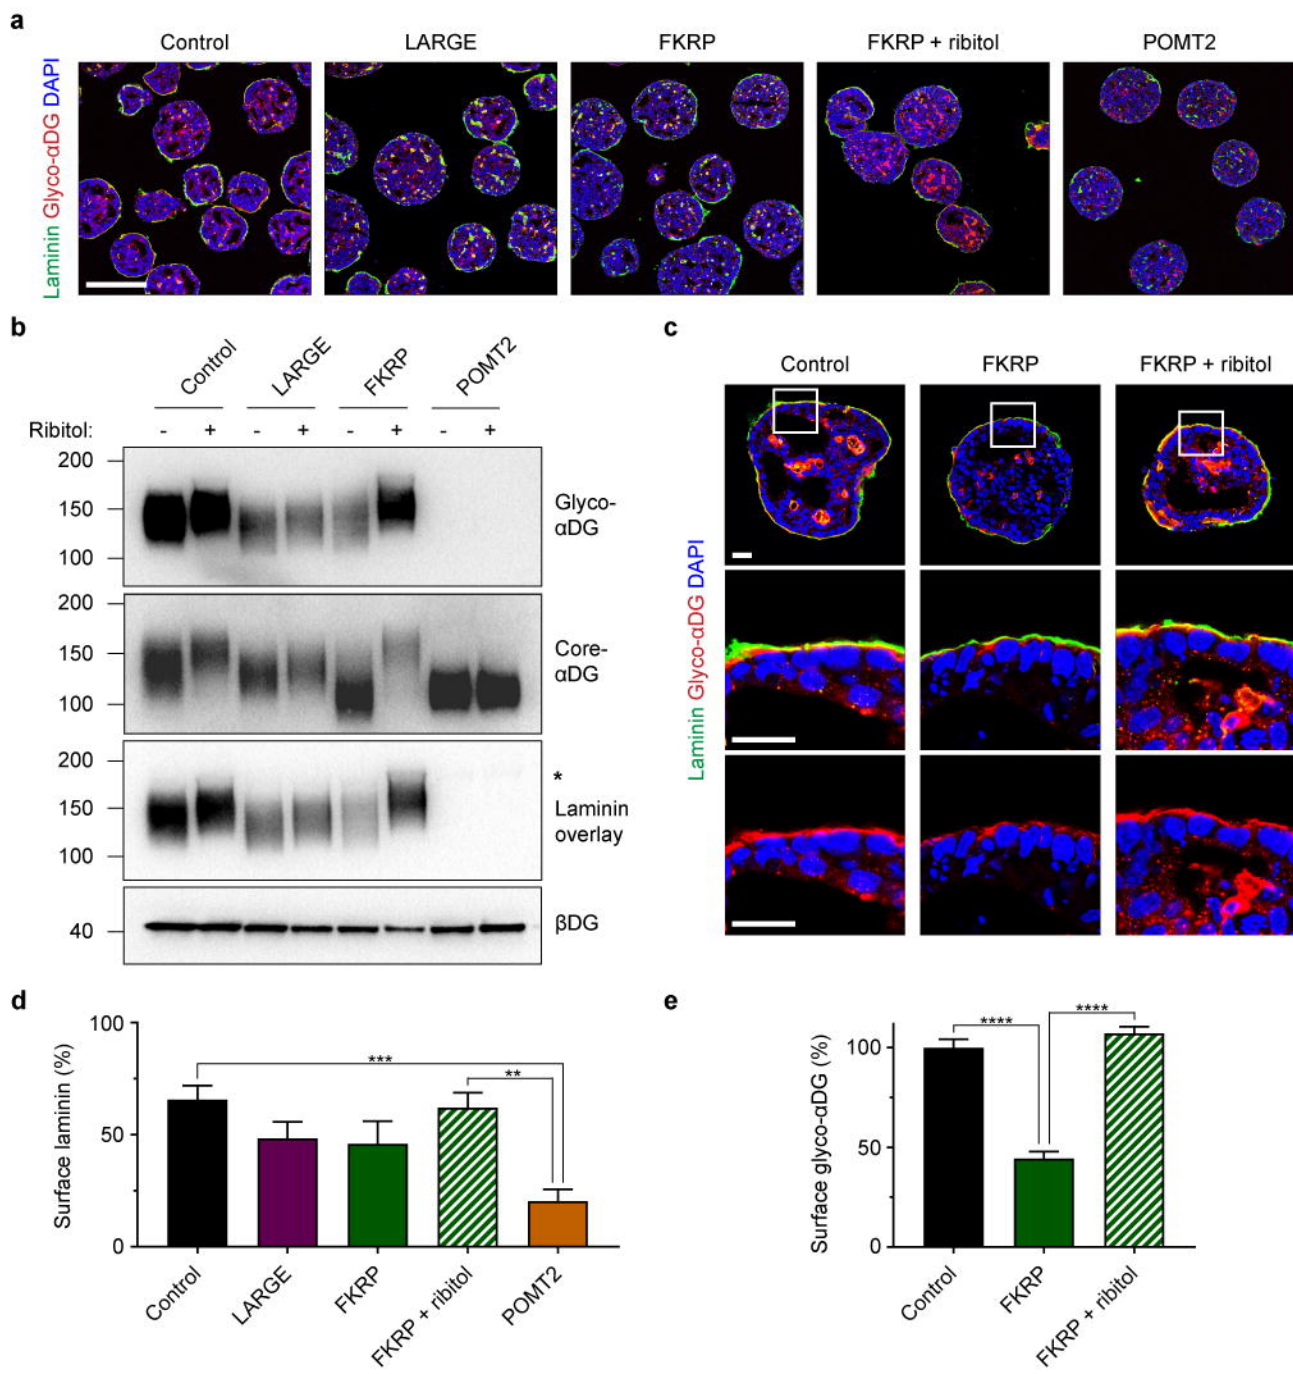

**Fig. 11****a**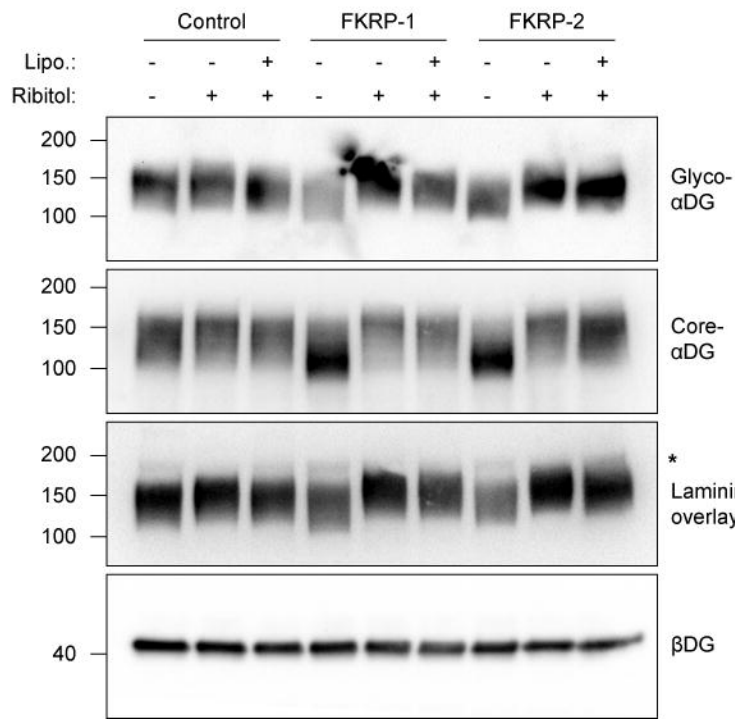**b**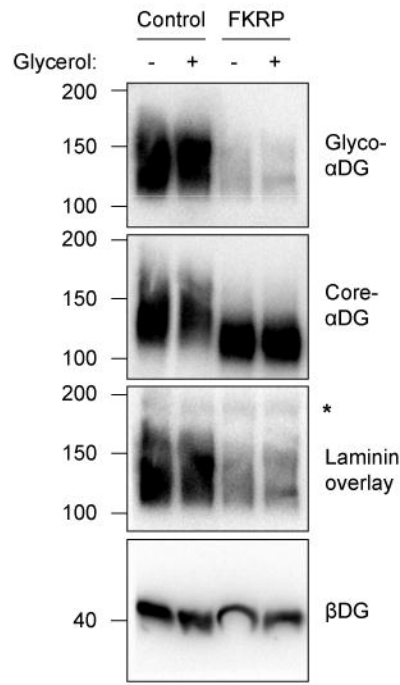

Source: http://biorxiv.org/content/10.1101/765131v1.full.pdf
